# Supplementary material for: Geographical concentration of falciparum malaria treated in the UK and delay to treatment with artesunate in severe cases: an observational study
Source: PubMed Central journal article supplement — BMJ Open. 2012 Nov 12;2(6):e001854. doi: 10.1136/bmjopen-2012-001854 (PMC3533059; doi:10.1136/bmjopen-2012-001854), 2012-11-12
Supplement: bmjopen-2012-001854.draft_revisions.pdf [file bmjopen-2012-001854.draft_revisions.pdf]

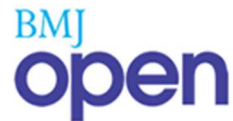

**Geographical concentration of falciparum malaria treated in the United Kingdom and delay-to-treatment with artesunate in severe cases: an observational study.**

|                                 |                                                                                                                                                                                                                                                                                                                |
|---------------------------------|----------------------------------------------------------------------------------------------------------------------------------------------------------------------------------------------------------------------------------------------------------------------------------------------------------------|
| Journal:                        | <i>BMJ Open</i>                                                                                                                                                                                                                                                                                                |
| Manuscript ID:                  | bmjopen-2012-001854                                                                                                                                                                                                                                                                                            |
| Article Type:                   | Research                                                                                                                                                                                                                                                                                                       |
| Date Submitted by the Author:   | 23-Jul-2012                                                                                                                                                                                                                                                                                                    |
| Complete List of Authors:       | Broderick, Claire; Hospital for Tropical Diseases, Friend, Philip; HPA Malaria Reference Laboratory, Smith, Valerie; HPA Malaria Reference Laboratory, Blaze, Marie; HPA Malaria Reference Laboratory, Gothard, Philip; Hospital for Tropical Diseases, Whitty, Christopher; HPA Malaria Reference Laboratory, |
| <b>Primary Subject Heading</b>: | Infectious diseases                                                                                                                                                                                                                                                                                            |
| Secondary Subject Heading:      | Epidemiology                                                                                                                                                                                                                                                                                                   |
| Keywords:                       | TROPICAL MEDICINE, EPIDEMIOLOGY, Geographical mapping < TROPICAL MEDICINE, INFECTIOUS DISEASES, PARASITOLOGY                                                                                                                                                                                                   |
|                                 |                                                                                                                                                                                                                                                                                                                |

SCHOLARONE™  
Manuscripts

1 **Geographical concentration of falciparum malaria treated in the United Kingdom**  
2 **and delay to treatment with artesunate in severe cases: an observational study.**  
3  
4

5  
6  
7  
8 Claire Broderick<sup>1</sup>, Philip Friend<sup>2</sup>, Valerie Smith<sup>2</sup>, Marie Blaze<sup>2</sup>, Philip Gothard<sup>1</sup>, Peter L  
9  
10 Chiodini<sup>1</sup>, Christopher JM Whitty<sup>2</sup>  
11

12  
13  
14 1) Hospital for Tropical Diseases, Capper St, London WC1E 6JB  
15

16  
17 Claire Broderick, Specialist Registrar; Philip Gothard, Consultant Physician.  
18

19 2) HPA Malaria Reference Laboratory, London School of Hygiene & Tropical  
20  
21 Medicine, Keppel St, London WC1B 7HT  
22

23  
24 Philip Friend, IT advisor; Valerie Smith, data manager; Marie Blaze, data manager; Peter  
25  
26 Chiodini, Director and Honorary Professor; Christopher Whitty, Professor and  
27  
28 epidemiologist.  
29

30  
31  
32 Pre-publication correspondence to:  
33

34  
35 Prof. Christopher Whitty  
36

37  
38 Clinical Research Department  
39

40  
41 London School of Hygiene & Tropical Medicine  
42

43  
44 Keppel St.London WC1B 7HT  
45

46  
47 [Christopher.whitty@lshtm.ac.uk](mailto:Christopher.whitty@lshtm.ac.uk)  
48

49  
50 If accepted for publication the corresponding author will be  
51

52  
53 Dr. Claire Broderick  
54

55  
56 The Hospital for Tropical Diseases  
57

58  
59 Capper St.  
60

London WC1E 6JB

[Clairebroderick@nhs.net](mailto:Clairebroderick@nhs.net)

For peer review only

1  
2  
3  
4  
5  
6  
7  
8  
9  
10  
11  
12  
13  
14  
15  
16  
17  
18  
19  
20  
21  
22  
23  
24  
25  
26  
27  
28  
29  
30  
31  
32  
33  
34  
35  
36  
37  
38  
39  
40  
41  
42  
43  
44  
45  
46  
47  
48  
49  
50  
51  
52  
53  
54  
55  
56  
57  
58  
59  
60

## **Abstract**

**Objectives:** To quantify geographical concentration of falciparum malaria cases in the UK at a hospital level. To assess potential delay-to-treatment associated with hub-and-spoke distribution of artesunate in severe cases.

### **Design:**

Observational study using national and hospital data

### **Setting and participants:**

3,520 patients notified to the Malaria Reference Laboratory 2008-2010, 34 patients treated with intravenous artesunate from a specialist tropical diseases centre 2002-2010.

### **Main outcome measures:**

Geographical location of falciparum cases notified in the UK. Diagnosis-to-treatment times for intravenous artesunate.

### **Results**

Eight centres accounted for 43.9% of the UK's total cases; notifications from 107 centres accounted for 10.2% of cases; 51.5% of hospitals seeing malaria notified 5 or fewer cases in 3 years. Centres that saw <10 cases/year treat 26.3% of malaria cases and 6.1% of cases are treated in hospitals seeing fewer than 2 patients a year. The concentration of falciparum malaria was highest in Greater London (1925, 54.7%), South East (515, 14.6%), East of England (402, 11.4%) and North West (192, 5.4%). The North East and Northern Ireland each notified 5 or fewer cases per year. Median diagnosis-to-treatment time was 1 hour (range 0.5-5) for patients receiving artesunate in the specialist centre; 7.5 hours (range 4-26 ) for patients receiving it in referring hospitals via the hub and spoke

1  
2 system (p 0.02); 25 hours (range 9-45) for patients receiving it on transfer to the regional  
3  
4 centre from a referring hospital (p 0.002).  
5  
6  
7  
8  
9

## 10 **Conclusions**

11  
12 Most UK hospitals see few cases of falciparum malaria and geographical distances are  
13 significant. Over a quarter of cases are seen in hospitals where malaria is rare, although  
14  
15 60% are seen in hospitals that see 50 cases or more over 3 years. A hub-and-spoke  
16  
17 system minimises drug wastage and ensures it is available in centres that see most cases  
18  
19 but is associated with treatment delays elsewhere.  
20  
21  
22  
23  
24  
25  
26  
27  
28  
29  
30  
31  
32  
33  
34  
35  
36  
37  
38  
39  
40  
41  
42  
43  
44  
45  
46  
47  
48  
49  
50  
51  
52  
53  
54  
55  
56  
57  
58  
59  
60

## Introduction

Falciparum malaria remains an important cause of morbidity and mortality in returning travelers. In the UK, there are 1200 to 1600 cases of falciparum malaria annually, most from Africa or Asia, with an overall case-fatality rate of 7.4 per 1000 reported cases<sup>1</sup>. Around 15% of falciparum cases in the UK are “severe” (Malaria Reference Laboratory 2012) based on WHO criteria<sup>2</sup>. Delay to effective treatment and lack of experience of dealing with severe malaria are associated with poor outcome in severe cases<sup>3,4,5</sup>.

Worldwide, parenteral quinine has been the mainstay of treatment for severe falciparum malaria for over a century and was first-line treatment in the last UK treatment guidelines (2007<sup>6</sup>). However, two recent large multicentre randomised control trials have demonstrated a significant mortality reduction with intravenous artesunate versus intravenous quinine in severe falciparum infection in African children (AQUAMAT<sup>7</sup>) and Asian adults (SEAQUAMAT<sup>8</sup>). In light of this new evidence, WHO now recommends intravenous artesunate as first-line treatment for severe falciparum infections<sup>2</sup>. It is almost certain the reduced mortality applies also in travellers returning from those regions. Artesunate is also easier to use than intravenous quinine: it can be administered as a bolus rather than an infusion; has no known cardiotoxicity; it is not known to cause hypoglycaemia associated with quinine<sup>8,9</sup>. For these reasons it is likely to replace quinine as the treatment of choice in the United Kingdom and other countries seeing cases of severe malaria once GMP licenced drug is available.

Intravenous artesunate is available in the UK but its use has been limited by restricted availability. Until recently, just one pharmaceutical company, based in Shanghai, was manufacturing the drug for international export. Their product, used in the AQUAMAT and

1 SEAQUAMT trials<sup>7,8</sup>, only gained WHO pre-qualification status in November 2010<sup>10</sup>.

2  
3  
4 Production is increasing worldwide but parenteral artesunate remains unlicensed for use in  
5  
6 the UK. Few hospitals regularly stock intravenous artesunate and national supplies have  
7  
8 been limited (June Minton, Hospital for Tropical Diseases, personal communication 2012).  
9  
10 Additionally the shelf-life of artesunate (around 18 months) is much lower than for quinine,  
11  
12 an operational issue for hospitals which see few cases.  
13  
14

15  
16  
17 Given the clear outcome advantages of artesunate but its limited availability, two models of  
18  
19 drug distribution might be considered: *universal stock in all acute hospitals (blanket*  
20  
21 *coverage)* and a *hub-and-spoke system* where critical stocks are kept in specialist centres  
22  
23 and couriered out when needed to hospitals with severe malaria cases. A form of hub-and-  
24  
25 spoke system has operated to date.  
26  
27

28  
29  
30 Minimising delay to effective treatment is essential in severe cases<sup>3,4,11</sup>. Geographical  
31  
32 distance is a key consideration for delay. There is existing evidence of geographical  
33  
34 clustering of malaria at a regional level<sup>1</sup>, but this is too broad brush to help with decisions  
35  
36 on a hub-and-spoke compared to blanket coverage distribution for a drug which many  
37  
38 centres will use rarely if at all. In this study, we therefore assess the geographical  
39  
40 distribution of falciparum malaria in the UK at hospital level, using data from the HPA  
41  
42 Malaria Reference Laboratory. We also examine data from a tertiary tropical diseases  
43  
44 centre that operates a hub-and-spoke system to distribute artesunate to referring  
45  
46 hospitals, specifically reviewing time-to-treatment. These data will inform decisions on the  
47  
48 optimal means of distributing intravenous artesunate UK-wide. The geographical  
49  
50 concentration of cases is also relevant to training needs for clinical and laboratory staff in  
51  
52 the diagnosis and management of malaria. The approach should also help other countries  
53  
54  
55  
56  
57  
58  
59  
60

1 with imported malaria which do not currently have universal artesunate coverage (most of  
2 them) consider the data they will need for their decisions.  
3  
4  
5  
6  
7  
8  
9

## 10 Methods

11 Malaria is a notifiable disease in the UK: clinicians are required to report all cases by law.  
12  
13 The Malaria Reference Laboratory (MRL), part of the UK Health Protection Agency,  
14 maintains the national surveillance database of reported malaria cases in the UK. It  
15 identifies malaria cases from statutory notification through local authorities; through  
16 laboratories sending blood films for diagnostic verification; through clinicians sending  
17 standardised malaria reports to the MRL. When a malaria case is notified, the MRL  
18 contacts the responsible clinician who is asked to complete a data collection form covering  
19 demographic and clinical data, including the notifying hospital's location and the patient's  
20 usual place-of-residence. This passive case detection system has been shown to identify at  
21 least 66% of cases of falciparum malaria in the UK<sup>12</sup> and it may be higher in areas where  
22 malaria is less often seen (over 90% from Scotland<sup>13</sup>).  
23  
24  
25  
26  
27  
28  
29  
30  
31  
32  
33  
34  
35  
36  
37  
38  
39

40 The MRL database was used to identify the location of every notified case of falciparum  
41 malaria in the UK in the years 2008, 2009 and 2010. For Greater London, the notifying  
42 hospital's name was recorded given the large number of hospitals; outside Greater  
43 London, the notifying hospital's town was recorded. The patient's usual place-of-residence  
44 was also recorded. Cases were excluded if there was insufficient information to identify  
45 accurately the notifying hospital or town. Where the notifying hospital's location and the  
46 patient's usual place-of-residence differed significantly (eg. notified from Liverpool, place-  
47 of-residence Cardiff), the notifying hospital's location was recorded as case location.  
48  
49  
50  
51  
52  
53  
54  
55  
56  
57  
58  
59  
60



1  
2  
3  
4  
5  
6  
7  
8  
9  
10  
11  
12  
13  
14  
15  
16  
17  
18  
19  
20  
21  
22  
23  
24  
25  
26  
27  
28  
29  
30  
31  
32  
33  
34  
35  
36  
37  
38  
39  
40  
41  
42  
43  
44  
45  
46  
47  
48  
49  
50  
51  
52  
53  
54  
55  
56  
57  
58  
59  
60

Data were anonymised and analysis was performed using EpiInfo and STATA 11. For each notifying site, the annual frequency of falciparum malaria and the total number of cases over 3 years was calculated. Using the decimal geographic coordinates of each notifying site, maps showing the geographical distribution of falciparum malaria within the UK and within each UK region, weighted for caseload, were generated. Cases were also analysed by the UK Government Office Region from which they were reported (North East, North West, Yorkshire and the Humber, East Midlands, West Midlands, East of England, South East, South West, Greater London, Northern Ireland, Scotland and Wales)<sup>14</sup>.

The Hospital for Tropical Diseases (HTD), London has been using intravenous artesunate in cases of severe malaria since 2002 and provides a hub-and-spoke distribution service. It arranges for intravenous artesunate to be couriered from its permanent stocks to referring hospitals via its Tropical Medicine telephone advice service when requested based on clinical need. HTD's Pharmacy records were used to identify inpatients treated with intravenous artesunate at any hospital (including HTD) between 2002 and August 2010. The referring hospitals' pharmacies were contacted and patient identities confirmed. Patients' medical and laboratory records were reviewed after seeking appropriate permission from the hospitals. A standardised proforma was used to record the following for every patient: demographics; parasitaemia; clinical features of severity (based on WHO criteria<sup>2</sup>) initial anti-malarial used; time of malaria diagnosis; time of first treatment with intravenous artesunate. All data were anonymised.

The diagnosis-to-treatment time was calculated for each case (time from the diagnosis of severe malaria as documented in the notes to time of first dose of intravenous artesunate as signed for on the drug chart). Difference between cases treated in a hospital with

1  
2 stocks, hospitals where artesunate was couriered and differences with hospitals which  
3  
4 transferred patients were calculated by the Wilcoxon Rank Sum test.  
5  
6  
7

## 8 Results:

### 9 10 11 12 Geographical clustering of cases in the UK

13  
14  
15  
16  
17 Of 3556 cases of falciparum malaria notified to the MRL between 2008 and 2010: 1096  
18 cases were in 2008; 1185 cases in 2009; 1275 cases in 2010. We excluded 12 cases from  
19 2008 (9 Scotland, 1 Berkshire, 2 London); 11 cases from 2009 (9 Scotland, 2 London); 13  
21 cases from 2010: (8 Scotland, 1 West Yorkshire, 2 London, 1 Surrey, 1 Somerset) due to  
22 incomplete geographical data, so in total 3520 cases are included in this study.  
23  
24  
25  
26  
27

28  
29  
30 Of these cases, 54.7% were notified from London, 14.6% from the South East, 11.4% from  
31 Eastern England, 5.5% from the North West. Together, the North East of England and  
32 Northern Ireland accounted for just 0.6% of cases, each notifying 5 or fewer cases per  
33 year (Table 1). Within all regions, cases were clustered around larger towns and cities and  
34 these are plotted out for the UK (Map 1), England (Map 2), the North West and West  
35 Midlands (Map 3), the South East and East of England (Map 4) and Greater London (Map  
36 5).  
37  
38  
39  
40  
41  
42  
43  
44  
45

46  
47  
48 Over the three years studied, eight centres notified more than 100 cases (6 Greater  
49 London hospitals, Croydon and Liverpool). Cases from these eight centres made up  
50 43.9% of the UK's total cases. Notifications from 31 centres accounted for 73.7% of the  
51 UK's total; 18 of these were Greater London hospitals. In contrast, 140 centres that saw  
52 fewer than a case a month saw 26% of cases (924), and 6% of cases were seen in  
53  
54  
55  
56  
57  
58  
59  
60

1 centres which saw less than 2 patients a year, many of which were some way from a  
2 potential hub (Table 2 and maps).  
3  
4  
5  
6  
7

8 *Intravenous artesunate via hub-and-spoke and time-to treatment.*  
9

10  
11  
12  
13  
14  
15  
16  
17  
18  
19  
20  
21  
22  
23  
24  
25  
26  
27  
28  
29  
30  
31  
32  
33  
34  
35  
36  
37  
38  
39  
40  
41  
42  
43  
44  
45  
46  
47  
48  
49  
50  
51  
52  
53  
54  
55  
56  
57  
58  
59  
60  
HTD pharmacy records identified 50 patients who started intravenous artesunate, 22 at  
HTD. Clinical data were available for 21 HTD cases (one case missing medical records),  
14 of whom transferred in from referring hospitals. Records identified 28 patients in  
referring hospitals treated with intravenous artesunate sent from HTD. Of these 13 could  
be included in this study (8 cases had incomplete patient identifiers; 7 cases incomplete  
medical records). 10 patients were in London hospitals, 2 in the South East and 1 in  
Eastern England. Therefore, 34 patients were included in total: 21 men and 13 women,  
age range 17- 70 years, median age 41 years. High parasite count was the most common  
criterion for starting intravenous artesunate: 29 of the 34 had a count greater than 2% on  
admission; 24 had a count greater than 5%. On presentation, 12 had cerebral malaria  
(35%), 10 had respiratory distress (29%), 6 had acute renal impairment (18%) and 12  
(35%) had 2 or more clinical features of severe malaria (Table 3).

In 23 cases (68%) the diagnosis-to-treatment time could be calculated. For 4/4 patients  
admitted to HTD with severe malaria, median time was 1 hour, range 0.5 to 5 hours. For  
9/13 patients who required artesunate to be couriered to their referring hospital, median  
time was 7.5 hours, range 4 to 26 hours, difference from the four treated in a hospital with  
drug stocks (HTD) of p 0.02 (Rank Sum). For 10/14 patients who presented elsewhere but  
were transferred to and given artesunate at HTD, median time was 25 hours, range 9 to 45  
hours, difference from the patients where artesunate was couriered p 0.002. For 25/26  
patients admitted to a referring hospital, intravenous quinine was given while they waited

1  
2 for intravenous artesunate. One patient did not receive any anti-malarial on initial  
3  
4 diagnosis of severe malaria and waited 4 hours before receiving intravenous artesunate  
5  
6 (Table 3).  
7  
8  
9

#### 10 Current cost of drugs.

11  
12  
13  
14  
15 By the standards of emergency life-saving drugs used in high-resource settings,  
16  
17 artesunate is not expensive. Drug wastage associated with universal stockage poses an  
18  
19 opportunity cost while artesunate supplies are limited, as hospitals seeing many cases  
20  
21 may consequently have inadequate drug available.  
22  
23

24  
25  
26 There are however some cost implications, outlined for illustrative purposes (June Minton,  
27  
28 personal communication 2012). A course of 5x 60mg vials (total 300mg) of artesunate at  
29  
30 2012 prices costs £287. A 60kg adult would require 144mg per dose, so would need 1.5  
31  
32 packs in the first 48 hours including loading, costing £381. For IV quinine a pack of 10x  
33  
34 300mg amps (total 3000mg) costs £41. A 60kg adult would require 1200mg loading dose  
35  
36 then 600mg per dose thereafter. Assuming it is given tds, this would require 4200mg in  
37  
38 total for first 48 hours, so about 1.5 packs, costing £61. Each adult treatment course of  
39  
40 artesunate discarded after the expiry date would therefore be around £400 on current  
41  
42 prices.  
43  
44  
45  
46  
47  
48  
49

#### 50 Discussion

51  
52  
53  
54  
55 This study shows that whilst the majority of UK patients with malaria are seen in centres  
56  
57 which see many cases of malaria, a significant minority are seen in centres where malaria  
58  
59  
60

1  
2 is rarely seen, and 216 cases (6.1%) were seen in centres which saw fewer than 2 cases a  
3  
4 year. Since 5-15% of cases of falciparum malaria probably become severe (although data  
5  
6 on this are not reliable)<sup>15</sup> these centres will probably treat a severe case less than once  
7  
8 every 5 years. There are 168 acute trusts in the UK and 171 centres reporting malaria over  
9  
10 the three years, so it is seen occasionally in the majority of UK hospitals. A hub-and-spoke  
11  
12 system for distributing artesunate was unsurprisingly associated with delays in starting  
13  
14 treatment- in this study of a relatively limited number of patients of around 7 hours.  
15  
16

17  
18  
19 The degree of clustering of malaria cases in hospitals has significant operational  
20  
21 implications. These include whether rarely used but important drugs, especially parenteral  
22  
23 artesunate, are distributed universally or by hub-and-spoke. It also has implications for  
24  
25 training needs, and support for hospitals with less experience of severe diseases since  
26  
27 mortality is inversely related to experience at least at a regional level<sup>5</sup>.  
28  
29

30  
31  
32 This hospital-level study is consistent with previous studies on the incidence of malaria in  
33  
34 the UK regions<sup>1,5</sup> and likely reflects the UK's demographics and travelling patterns. Outside  
35  
36 London, the South East and East of England, the frequency of falciparum malaria was low.  
37  
38 Together, the North East, Scotland, Wales and Northern Ireland accounted for less than  
39  
40 4% of all cases. The North East of England and Northern Ireland each notified  
41  
42 approximately 3 cases of falciparum malaria per year. The MRL capture rate is 66% so we  
43  
44 estimate these regions may each see 4 to 5 cases of falciparum malaria per year.  
45  
46

47  
48 Assuming 5-15% of falciparum cases become "severe", we estimate each of these UK  
49  
50 regions could expect to use intravenous artesunate once every 1 to 2 years. In Wales and  
51  
52 Scotland we estimate it might be used 3 to 4 times per year, with most hospitals using no  
53  
54 drug but long geographical distances between hospitals.  
55  
56  
57  
58  
59  
60

1 UK intravenous artesunate supplies have been limited for several years for operational  
2 and regulatory reasons, and it is unlikely this will be resolved soon. Until supplies improve,  
3 the UK and other non-endemic countries will need to distribute and use the drug efficiently  
4 and effectively. Intravenous artesunate has a shelf-life of around 18 months. Our data  
5 suggest that a universal stock system would lead to substantial drug wastage: more than  
6 50% of UK centres with at least one case notified 5 or fewer cases of falciparum malaria  
7 over 3 years and will seldom see severe cases; 2 UK regions notified less than 10 cases  
8 over 3 years. On the other hand, as our data shows, a hub-and-spoke system will lead to  
9 delays in providing artesunate, and since this has been associated with over 20%  
10 reduction in mortality in adults such a delay is likely to be fatal in at least some cases.  
11  
12  
13  
14  
15  
16  
17  
18  
19  
20  
21  
22  
23  
24  
25  
26  
27

#### 28 Limitations:

29 The MRL uses a passive case detection system, which relies on the clinician or laboratory  
30 to report malaria cases. Therefore under-reporting is inevitable: however a capture-  
31 recapture study estimated that 66% of falciparum cases in England are detected by this  
32 system<sup>12</sup> which is high by international standards. Case-detection rate may vary by  
33 hospital or region and it may be higher in areas where malaria is less often seen (over  
34 90% from Scotland<sup>13</sup>).  
35  
36  
37  
38  
39  
40  
41  
42  
43  
44  
45

46 Of 34 cases excluded due to incomplete data on case location, 26 were from Scotland.

47 These cases represent a significant proportion of the total number of Scottish cases; they  
48 would not have a significant impact on the overall trends described here but make  
49 extrapolating results to Scotland difficult. The Royal Liverpool Hospital and the Hospital for  
50 Tropical Diseases are national centres for Tropical Medicine, regularly receiving patients  
51 and malaria films from throughout the UK. In 98/127 Liverpool cases and 45/266 HTD  
52  
53  
54  
55  
56  
57  
58  
59  
60

1 cases included in this study, the notifier's location and the patient's usual place-of-  
2 residence were located in different counties or regions, including Greater Manchester,  
3 South West England, Scotland and Wales. It was not clear which of these cases  
4 represented referrals and which represented temporary visitors so all Liverpool  
5 notifications were coded as "Liverpool" and all HTD notifications as "HTD". Some of these  
6 patients may have presented elsewhere initially.  
7  
8  
9  
10  
11  
12  
13

14  
15  
16  
17 HTD operates probably the largest hub-and-spoke distribution system for intravenous  
18 artesunate in the UK. Despite this, the number of cases that could be included was small:  
19 34/50 patients receiving intravenous artesunate during this time period could be included  
20 in this study. The data we have are retrospective. To calculate the diagnosis-to-treatment  
21 time, we used the times as documented in the medical records. Clinicians do not always  
22 document decisions or diagnoses immediately, so the diagnosis-to-treatment times may  
23 appear shorter in this study, which is therefore conservative on delay which may well in  
24 practice be longer than recorded.  
25  
26  
27  
28  
29  
30  
31  
32  
33  
34  
35  
36  
37  
38

### 39 Conclusions

40  
41 If intravenous artesunate becomes first-line treatment for severe malaria in Europe, UK  
42 hospitals will require rapid and reliable access to this emergency drug. While artesunate  
43 supplies remain limited, a hub-and-spoke system, based around regional infection centres  
44 will minimise drug wastage and ensure the drug is available in the centres which see most  
45 cases, but will lead to delays, and almost certainly some avoidable deaths in centres which  
46 less regularly see cases and are geographically some way from hubs. A system which  
47 restricts artesunate to hospitals that see over 100 cases in 3 years would lead to two-thirds  
48 of cases being in other centres. Even having artesunate in the 31 hospitals that see more  
49  
50  
51  
52  
53  
54  
55  
56  
57  
58  
59  
60

1 than 50 cases in 3 years would leave over 25% of malaria cases being treated elsewhere.  
2  
3  
4 When parenteral artesunate becomes more freely available, these data suggest the UK  
5  
6 should move rapidly towards universal drug distribution, aiming for all acute hospitals to  
7  
8 maintain permanent stocks, to ensure early artesunate treatment for all UK severe malaria  
9  
10 cases.  
11

### 12 13 14 **Acknowledgements.**

15  
16  
17 The authors would like to acknowledge funding for the Malaria Reference Laboratory from  
18  
19 the Health Protection Agency, and additional support from the Special Trustees of the  
20  
21 Hospital for Tropical Diseases. Funders had no part in design, analysis or decision to  
22  
23 publish. PLC and CJMW are part of the Malaria Centre, LSHTM. PLC is supported by the  
24  
25 UCL Hospitals Comprehensive Biomedical Research Centre Infection Theme.  
26  
27  
28  
29  
30  
31  
32  
33  
34  
35  
36  
37  
38  
39  
40  
41  
42  
43  
44  
45  
46  
47  
48  
49  
50  
51  
52  
53  
54  
55  
56  
57  
58  
59  
60



Table 1*Reported cases of falciparum malaria by UK region, 2008-2010*

|                               | 2008   |            | 2009   |            | 2010   |            | All 3 years |            |
|-------------------------------|--------|------------|--------|------------|--------|------------|-------------|------------|
|                               | Number | % of total | Number | % of total | Number | % of total | Number      | % of total |
| <b>North East</b>             | 1      | 0.1        | 4      | 0.3        | 5      | 0.4        | 10          | 0.3        |
| <b>North West</b>             | 49     | 4.5        | 58     | 5          | 85     | 6.7        | 192         | 5.4        |
| <b>Yorkshire &amp; Humber</b> | 19     | 1.8        | 26     | 2.2        | 53     | 4.2        | 98          | 2.8        |
| <b>East Midlands</b>          | 15     | 1.4        | 18     | 1.5        | 34     | 2.7        | 67          | 1.9        |
| <b>West Midlands</b>          | 27     | 2.5        | 45     | 3.8        | 53     | 4.2        | 125         | 3.6        |
| <b>East of England</b>        | 140    | 12.9       | 124    | 10.6       | 138    | 10.9       | 402         | 11.4       |
| <b>South East</b>             | 164    | 15.1       | 161    | 13.7       | 190    | 15.1       | 515         | 14.6       |
| <b>South West</b>             | 30     | 2.8        | 24     | 2.1        | 34     | 2.7        | 88          | 2.5        |
| <b>Greater London</b>         | 614    | 56.6       | 682    | 58.1       | 629    | 49.9       | 1925        | 54.7       |
| <b>Scotland</b>               | 13     | 1.2        | 18     | 1.5        | 22     | 1.7        | 53          | 1.5        |
| <b>Wales</b>                  | 10     | 0.9        | 10     | 0.9        | 16     | 1.3        | 36          | 1          |
| <b>Northern Ireland</b>       | 2      | 0.2        | 4      | 0.3        | 3      | 0.2        | 9           | 0.3        |
| <b>Total</b>                  | 1084   |            | 1174   |            | 1262   |            | 3520        |            |

**Table 2***Number of UK hospitals notifying cases of falciparum malaria, 2008-2010*

| <b>Number of cases notified in 3 years</b> | <b>Number of centres</b> | <b>Total number of cases</b> | <b>% of UK total cases</b> | <b>Cumulative % of UK cases</b> |
|--------------------------------------------|--------------------------|------------------------------|----------------------------|---------------------------------|
| <b>&gt;100</b>                             | 8                        | 1547                         | 43.9                       | 43.9                            |
| <b>51-100</b>                              | 8                        | 552                          | 15.7                       | 59.6                            |
| <b>26-50</b>                               | 15                       | 497                          | 14.1                       | 73.7                            |
| <b>11-25</b>                               | 33                       | 565                          | 16.1                       | 89.8                            |
| <b>6-10</b>                                | 19                       | 143                          | 4.1                        | 93.9                            |
| <b>1-5</b>                                 | 88                       | 216                          | 6.1                        | 100                             |

For peer review only

**Table 3***Falciparum* cases treated with intravenous artesunate from the Hospital for Tropical Diseases

| Age | Gender | Parasitaemia on admission | Number of clinical features of severity | Admitting hospital | Site of first artesunate dose | Diagnosis-to-treatment time (hrs) | Initial anti-malarial       |
|-----|--------|---------------------------|-----------------------------------------|--------------------|-------------------------------|-----------------------------------|-----------------------------|
| 57  | M      | 2.3                       | 1                                       | Elsewhere          | Elsewhere                     | 12                                | iv quinine & doxycycline    |
| 41  | M      | 15                        | 6                                       | Elsewhere          | Elsewhere                     | 13                                | iv quinine                  |
| 34  | F      | 37                        | 1                                       | Elsewhere          | HTD                           | 14                                | iv quinine                  |
| 45  | M      | 27                        | 0                                       | Elsewhere          | HTD                           | 41.5                              | iv quinine                  |
| 51  | M      | 15                        | 3                                       | Elsewhere          | HTD                           | 13                                | iv quinine                  |
| 62  | F      | 17                        | 0                                       | Elsewhere          | Elsewhere                     | 5                                 | iv quinine                  |
| 38  | M      | 8                         | 1                                       | Elsewhere          | Elsewhere                     | 26                                | iv quinine & im artemether  |
| 24  | F      | 2.7                       | 0                                       | HTD                | HTD                           | 1                                 | iv artesunate               |
| 24  | M      | 2.6                       | 0                                       | Elsewhere          | HTD                           | 29                                | iv quinine                  |
| 39  | M      | 23                        | 3                                       | Elsewhere          | Elsewhere                     | 4.5                               | iv quinine                  |
| 46  | M      | 8.1                       | 2                                       | Elsewhere          | HTD                           | 34                                | iv quinine                  |
| 41  | M      | 2.3                       | 2                                       | Elsewhere          | HTD                           | 9                                 | iv quinine                  |
| 47  | F      | 0.2 (recurrence)          | 0                                       | HTD                | HTD                           | 5                                 | iv artesunate               |
| 46  | M      | 20                        | 2                                       | Elsewhere          | Elsewhere                     | 8                                 | iv quinine                  |
| 45  | F      | 1.8                       | 1                                       | Elsewhere          | HTD                           | 45                                | iv quinine                  |
| 42  | M      | 1                         | 0                                       | HTD                | HTD                           | 3.5                               | iv artesunate               |
| 36  | M      | 0.3                       | 1                                       | HTD                | HTD                           | 1                                 | iv artesunate               |
| 49  | M      | 15                        | 1                                       | HTD                | HTD                           | 5                                 | iv quinine                  |
| 17  | M      | 1.1                       | 0                                       | HTD                | HTD                           | 11                                | iv quinine                  |
| 52  | F      | 50                        | 4                                       | Elsewhere          | Elsewhere                     | Unknown                           | iv quinine                  |
| 34  | F      | 22                        | 4                                       | Elsewhere          | Elsewhere                     | 4                                 | iv artesunate & clindamycin |
| 52  | F      | 5.2                       | 0                                       | Elsewhere          | Elsewhere                     | Unknown                           | Unknown                     |

|    |   |      |   |           |           |         |                          |
|----|---|------|---|-----------|-----------|---------|--------------------------|
| 27 | F | 5    | 0 | Elsewhere | HTD       | Unknown | iv quinine               |
| 52 | M | 10   | 1 | Elsewhere | HTD       | 33      | iv quinine               |
| 36 | M | 17.2 | 0 | HTD       | HTD       | 0.5     | iv artesunate            |
| 41 | F | 10   | 1 | Elsewhere | Elsewhere | 7.5     | iv quinine & doxycycline |
| 35 | F | 9    | 0 | Elsewhere | Elsewhere | Unknown | iv quinine               |
| 70 | M | 8    | 1 | Elsewhere | Elsewhere | Unknown | iv quinine               |
| 51 | M | 9.2  | 0 | Elsewhere | Elsewhere | 5       | iv quinine               |
| 39 | M | 30   | 2 | Elsewhere | HTD       | Unknown | iv quinine               |
| 31 | F | 4.8  | 1 | Elsewhere | HTD       | Unknown | iv quinine               |
| 30 | M | 26.8 | 2 | Elsewhere | HTD       | 21.5    | iv quinine               |
| 47 | F | 12.5 | 2 | Elsewhere | HTD       | 14.5    | iv quinine               |
| 43 | M | 16.4 | 3 | Elsewhere | HTD       | Unknown | iv quinine               |

## References

- 1  
2  
3  
4  
5  
6  
7  
8  
9  
10  
11  
12  
13  
14  
15  
16  
17  
18  
19  
20  
21  
22  
23  
24  
25  
26  
27  
28  
29  
30  
31  
32  
33  
34  
35  
36  
37  
38  
39  
40  
41  
42  
43  
44  
45  
46  
47  
48  
49  
50  
51  
52  
53  
54  
55  
56  
57  
58  
59  
60
- <sup>1</sup>Smith A, Bradley D, Smith V, Blaze M, Behrens R, Chiodini P et al. Imported malaria and high risk groups: observational study using UK surveillance data 1987-2006. *BMJ* 2008; 337:a120
- <sup>2</sup>World Health Organization. Guidelines for the treatment of malaria. *2nd ed.* Geneva: The World Health Organization; 2010
- <sup>3</sup>Newman RD, Parise ME, Barber AM, Steketee RW. Malaria-related deaths among U.S. travelers, 1963-2001. *Ann Intern Med* 2004; 141(7): 547-55
- <sup>4</sup>Christen D, Steffen R, Schlagenhauf P. Deaths caused by malaria in Switzerland 1988-2002. *Am J Trop Med Hyg* 2006; 75(6): 1188-94.
- <sup>5</sup>Checkley A, Smith A, Smith V, Blaze M, Bradley D et al. Risk factors for mortality from imported falciparum malaria in the United Kingdom over 20 years: an observational study. *BMJ* 2012; 344: e2116
- <sup>6</sup>Lalloo DG, Shingadia D, Pasvol G, Chiodini PL, Whitty CJM, Beeching NJ et al. UK malaria treatment guidelines. *J Infect.* 2007; 54(2): 111-21
- <sup>7</sup>Dondorp A, Fanello C, Hendriksen I, Gomes E, Seni A, Chhaganlal K et al. Artesunate versus quinine in the treatment of severe falciparum malaria in African children (AQUAMAT): an open-label, randomised trial. *Lancet* 2010; 376: 1647-57
- <sup>8</sup>Dondorp A, Nosten F, Stepniewska K, Day N, White N at al. Artesunate versus quinine for treatment of severe falciparum malaria: a randomised trial. *Lancet* 2005; 366: 717-25
- <sup>9</sup>Newton PN, Angus BJ, Chierakul W, Dondorp A, Ruangveerayuth R, Silamut K et al. Randomised comparison of artesunate and quinine in the treatment of severe falciparum malaria. *Clin Infect Dis* 2003; 37(1): 7-16.
- <sup>10</sup>World Health Organization. *Prequalification programme: a United Nations programme managed by WHO, 2010.* <http://apps.who.int/prequal/>
- <sup>11</sup>Gomes MF, Faiz MA, Gyapong JO, Warsame M, Agbenyega T, Babiker A et al. Pre-referral rectal artesunate to prevent death and disability in severe malaria: a placebo-controlled trial. *Lancet.* 2009; 373: 557-66.
- <sup>12</sup>Cathcart SJ, Lawrence J, Grant A, Quinn D, Whitty CJ, Jones J et al. Estimating unreported malaria cases in England: a capture-recapture study. *Epidemiol Infect* 2010; 138(7): 1052-8
- <sup>13</sup>Unger HW, McCallum AD, Ukachukwu V, McGoldrick C, Perrow K, Latin G, Norrie G, Morris S, Smith CC, Jones ME. Imported malaria in Scotland--an overview of surveillance, reporting and trends. *Travel Med Infect Dis.* 2011; 9(6): 289-97.
- <sup>14</sup>Office for National Statistics. <http://www.ons.gov.uk/ons/guide-method/geography/beginner-s-guide/administrative/england/government-office-regions/index.html>
- <sup>15</sup>Lubell Y, Staedke SG, Greenwood BM, Kanya MR, Molyneux M, Newton PN et al . Likely health outcomes for untreated acute febrile illness in the tropics in decision and economic models: a Delphi survey. *PLoS One.* 2011; 6: e17439.



1  
2  
3  
4  
5  
6  
7  
8  
9  
10  
11  
12  
13  
14  
15  
16  
17  
18  
19  
20  
21  
22  
23  
24  
25  
26  
27  
28  
29  
30  
31  
32  
33  
34  
35  
36  
37  
38  
39  
40  
41  
42  
43  
44  
45  
46  
47  
48  
49  
50  
51  
52  
53  
54  
55  
56  
57  
58  
59  
60

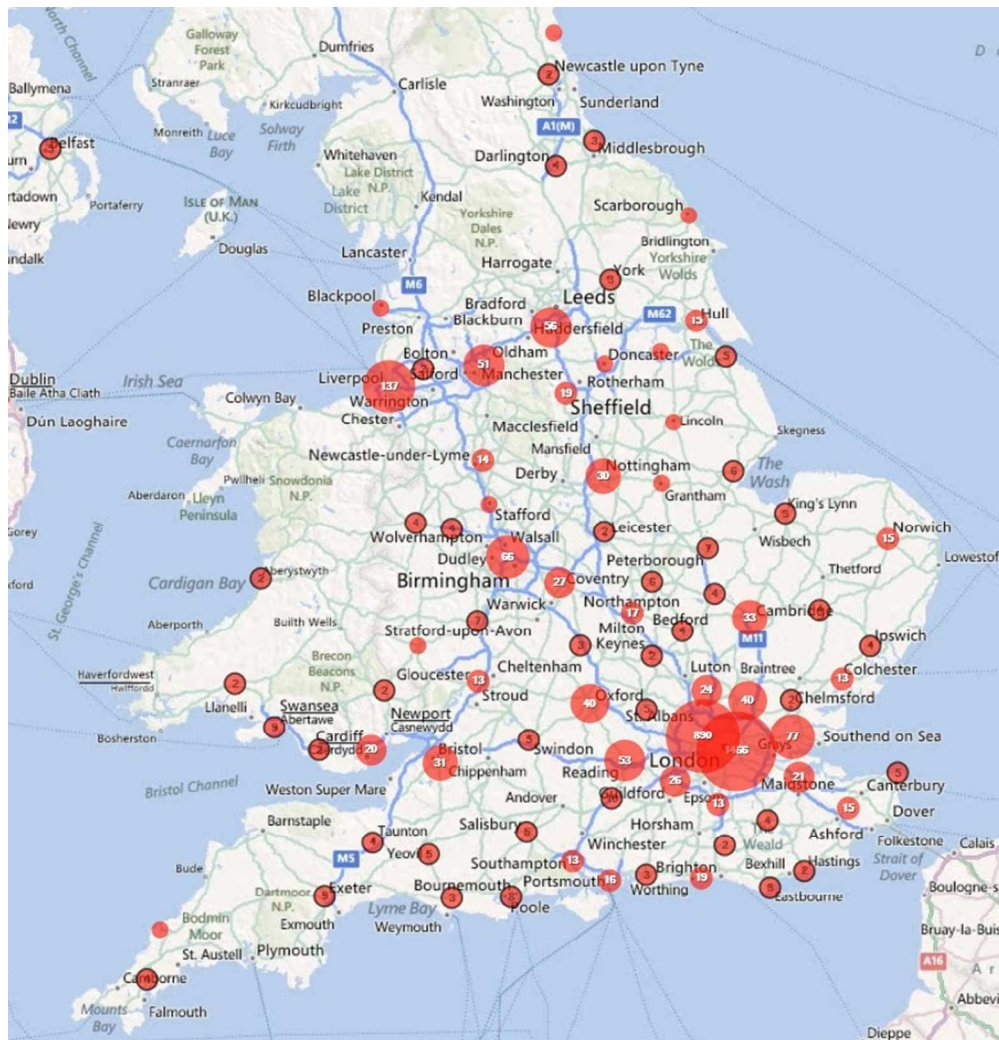

Map 2. Geographical distribution of falciparum malaria notifications in England, 2008-2010  
230x238mm (96 x 96 DPI)

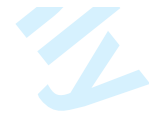

1  
2  
3  
4  
5  
6  
7  
8  
9  
10  
11  
12  
13  
14  
15  
16  
17  
18  
19  
20  
21  
22  
23  
24  
25  
26  
27  
28  
29  
30  
31  
32  
33  
34  
35  
36  
37  
38  
39  
40  
41  
42  
43  
44  
45  
46  
47  
48  
49  
50  
51  
52  
53  
54  
55  
56  
57  
58  
59  
60

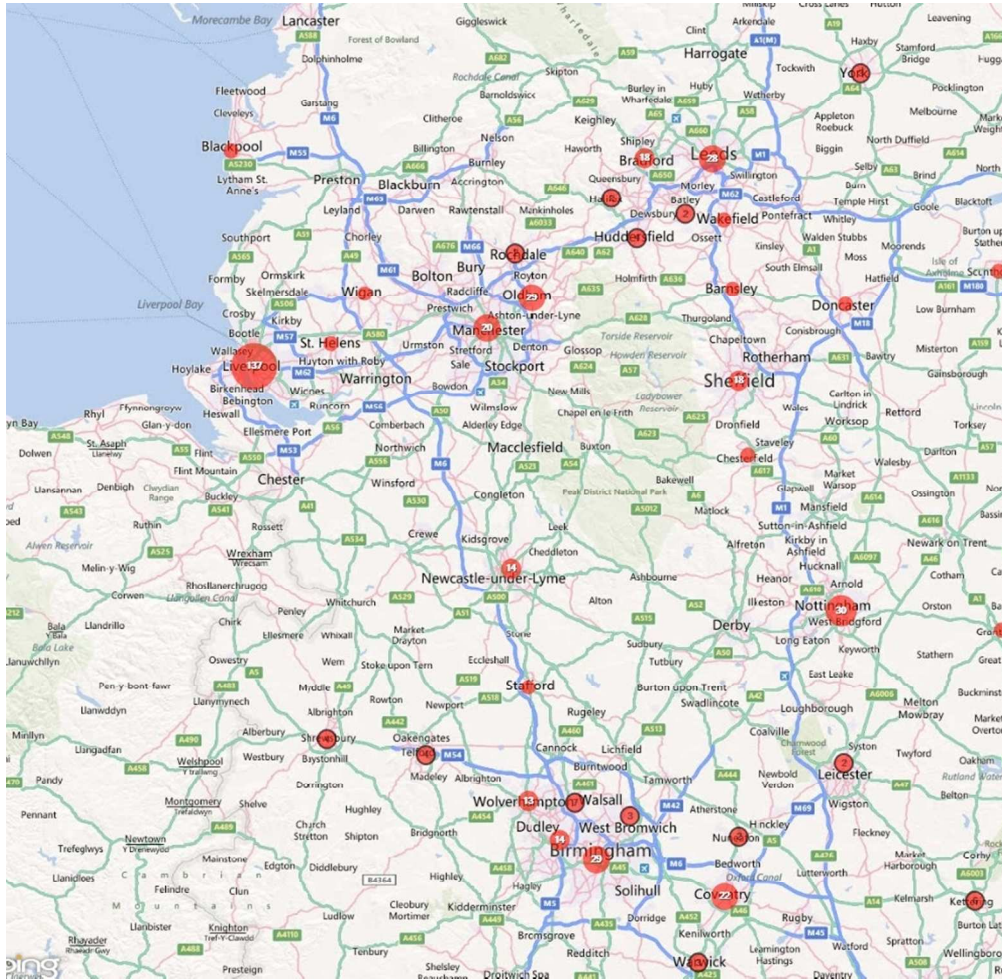

Map 3. Geographical distribution of falciparum malaria notifications in the North West and West Midlands, 2008-2010  
262x255mm (96 x 96 DPI)

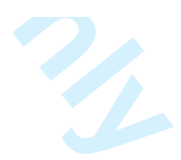



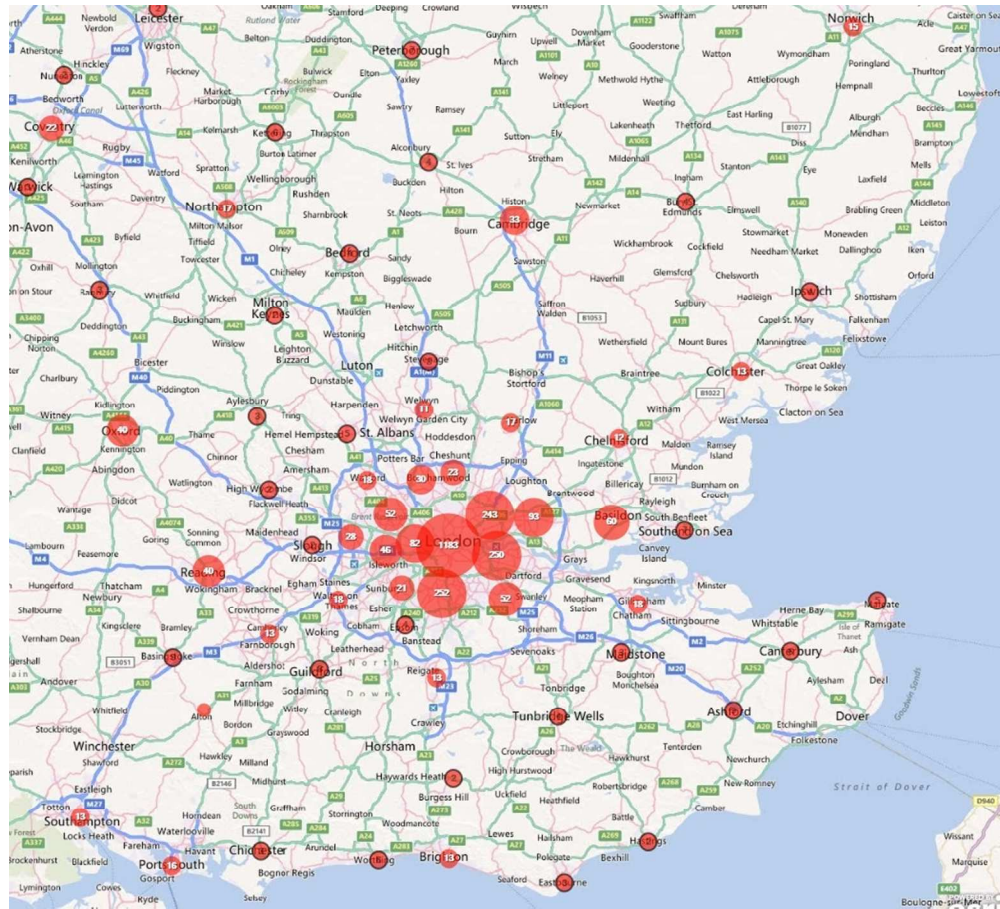

Map 4. Geographical distribution of falciparum malaria notifications in the South East and East of England, 2008-2010  
278x251mm (96 x 96 DPI)

1  
2  
3  
4  
5  
6  
7  
8  
9  
10  
11  
12  
13  
14  
15  
16  
17  
18  
19  
20  
21  
22  
23  
24  
25  
26  
27  
28  
29  
30  
31  
32  
33  
34  
35  
36  
37  
38  
39  
40  
41  
42  
43  
44  
45  
46  
47  
48  
49  
50  
51  
52  
53  
54  
55  
56  
57  
58  
59  
60

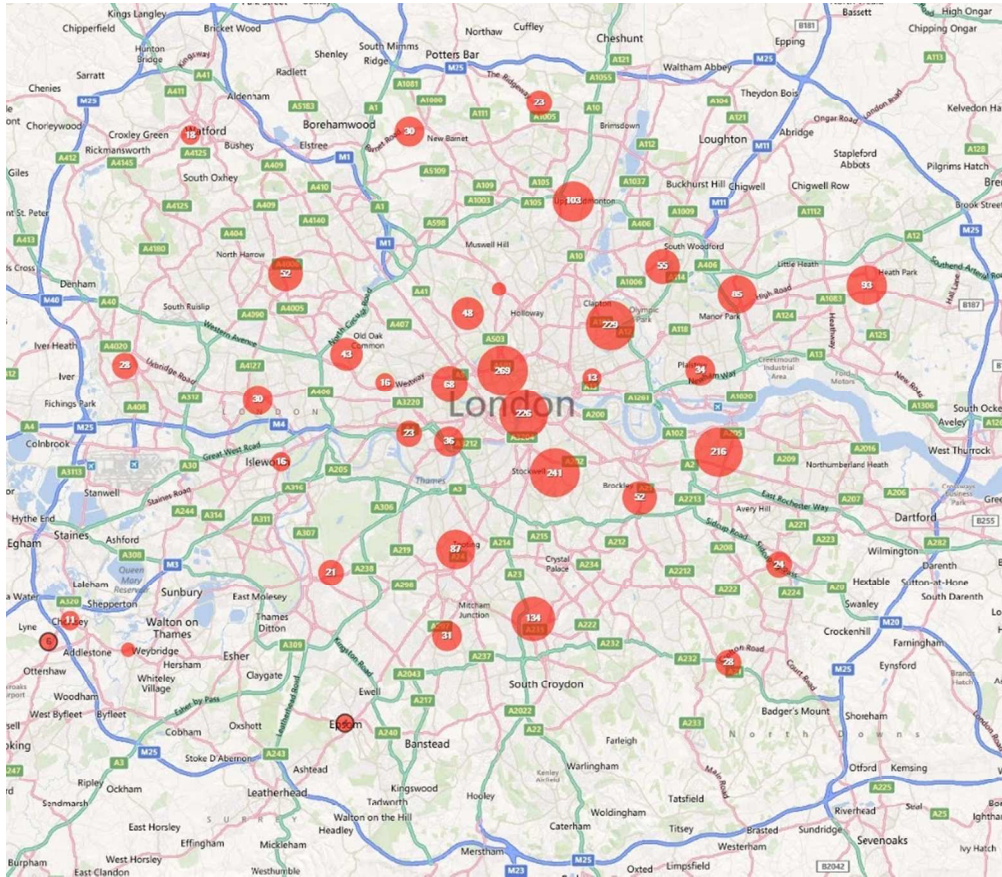

Map 5. Geographical distribution of falciparum malaria notifications in Greater London, 2008-2010  
274x239mm (96 x 96 DPI)

For peer review only

## STROBE Statement—checklist of items that should be included in reports of observational studies

|                              | Item No | Recommendation                                                                                                                                                                                                                                                                                                                                                                                                                                                                                                                                                                                                                                                                                   |
|------------------------------|---------|--------------------------------------------------------------------------------------------------------------------------------------------------------------------------------------------------------------------------------------------------------------------------------------------------------------------------------------------------------------------------------------------------------------------------------------------------------------------------------------------------------------------------------------------------------------------------------------------------------------------------------------------------------------------------------------------------|
| <b>Title and abstract</b>    | 1       | (a) Indicate the study's design with a commonly used term in the title or the abstract<br>(b) Provide in the abstract an informative and balanced summary of what was done and what was found                                                                                                                                                                                                                                                                                                                                                                                                                                                                                                    |
| <b>Introduction</b>          |         |                                                                                                                                                                                                                                                                                                                                                                                                                                                                                                                                                                                                                                                                                                  |
| Background/rationale         | 2       | Explain the scientific background and rationale for the investigation being reported                                                                                                                                                                                                                                                                                                                                                                                                                                                                                                                                                                                                             |
| Objectives                   | 3       | State specific objectives, including any prespecified hypotheses                                                                                                                                                                                                                                                                                                                                                                                                                                                                                                                                                                                                                                 |
| <b>Methods</b>               |         |                                                                                                                                                                                                                                                                                                                                                                                                                                                                                                                                                                                                                                                                                                  |
| Study design                 | 4       | Present key elements of study design early in the paper                                                                                                                                                                                                                                                                                                                                                                                                                                                                                                                                                                                                                                          |
| Setting                      | 5       | Describe the setting, locations, and relevant dates, including periods of recruitment, exposure, follow-up, and data collection                                                                                                                                                                                                                                                                                                                                                                                                                                                                                                                                                                  |
| Participants                 | 6       | (a) <i>Cohort study</i> —Give the eligibility criteria, and the sources and methods of selection of participants. Describe methods of follow-up<br><i>Case-control study</i> —Give the eligibility criteria, and the sources and methods of case ascertainment and control selection. Give the rationale for the choice of cases and controls<br><i>Cross-sectional study</i> —Give the eligibility criteria, and the sources and methods of selection of participants<br>(b) <i>Cohort study</i> —For matched studies, give matching criteria and number of exposed and unexposed<br><i>Case-control study</i> —For matched studies, give matching criteria and the number of controls per case |
| Variables                    | 7       | Clearly define all outcomes, exposures, predictors, potential confounders, and effect modifiers. Give diagnostic criteria, if applicable                                                                                                                                                                                                                                                                                                                                                                                                                                                                                                                                                         |
| Data sources/<br>measurement | 8*      | For each variable of interest, give sources of data and details of methods of assessment (measurement). Describe comparability of assessment methods if there is more than one group                                                                                                                                                                                                                                                                                                                                                                                                                                                                                                             |
| Bias                         | 9       | Describe any efforts to address potential sources of bias                                                                                                                                                                                                                                                                                                                                                                                                                                                                                                                                                                                                                                        |
| Study size                   | 10      | Explain how the study size was arrived at                                                                                                                                                                                                                                                                                                                                                                                                                                                                                                                                                                                                                                                        |
| Quantitative variables       | 11      | Explain how quantitative variables were handled in the analyses. If applicable, describe which groupings were chosen and why                                                                                                                                                                                                                                                                                                                                                                                                                                                                                                                                                                     |
| Statistical methods          | 12      | (a) Describe all statistical methods, including those used to control for confounding<br>(b) Describe any methods used to examine subgroups and interactions<br>(c) Explain how missing data were addressed<br>(d) <i>Cohort study</i> —If applicable, explain how loss to follow-up was addressed<br><i>Case-control study</i> —If applicable, explain how matching of cases and controls was addressed<br><i>Cross-sectional study</i> —If applicable, describe analytical methods taking account of sampling strategy<br>(e) Describe any sensitivity analyses                                                                                                                                |

Continued on next page

**Results**

|                  |     |                                                                                                                                                                                                                                                                                                                                                                                                               |
|------------------|-----|---------------------------------------------------------------------------------------------------------------------------------------------------------------------------------------------------------------------------------------------------------------------------------------------------------------------------------------------------------------------------------------------------------------|
| Participants     | 13* | (a) Report numbers of individuals at each stage of study—eg numbers potentially eligible, examined for eligibility, confirmed eligible, included in the study, completing follow-up, and analysed<br>(b) Give reasons for non-participation at each stage<br>(c) Consider use of a flow diagram                                                                                                               |
| Descriptive data | 14* | (a) Give characteristics of study participants (eg demographic, clinical, social) and information on exposures and potential confounders<br>(b) Indicate number of participants with missing data for each variable of interest<br>(c) <i>Cohort study</i> —Summarise follow-up time (eg, average and total amount)                                                                                           |
| Outcome data     | 15* | <i>Cohort study</i> —Report numbers of outcome events or summary measures over time<br><i>Case-control study</i> —Report numbers in each exposure category, or summary measures of exposure<br><i>Cross-sectional study</i> —Report numbers of outcome events or summary measures                                                                                                                             |
| Main results     | 16  | (a) Give unadjusted estimates and, if applicable, confounder-adjusted estimates and their precision (eg, 95% confidence interval). Make clear which confounders were adjusted for and why they were included<br>(b) Report category boundaries when continuous variables were categorized<br>(c) If relevant, consider translating estimates of relative risk into absolute risk for a meaningful time period |
| Other analyses   | 17  | Report other analyses done—eg analyses of subgroups and interactions, and sensitivity analyses                                                                                                                                                                                                                                                                                                                |

**Discussion**

|                  |    |                                                                                                                                                                            |
|------------------|----|----------------------------------------------------------------------------------------------------------------------------------------------------------------------------|
| Key results      | 18 | Summarise key results with reference to study objectives                                                                                                                   |
| Limitations      | 19 | Discuss limitations of the study, taking into account sources of potential bias or imprecision. Discuss both direction and magnitude of any potential bias                 |
| Interpretation   | 20 | Give a cautious overall interpretation of results considering objectives, limitations, multiplicity of analyses, results from similar studies, and other relevant evidence |
| Generalisability | 21 | Discuss the generalisability (external validity) of the study results                                                                                                      |

**Other information**

|         |    |                                                                                                                                                               |
|---------|----|---------------------------------------------------------------------------------------------------------------------------------------------------------------|
| Funding | 22 | Give the source of funding and the role of the funders for the present study and, if applicable, for the original study on which the present article is based |
|---------|----|---------------------------------------------------------------------------------------------------------------------------------------------------------------|

\*Give information separately for cases and controls in case-control studies and, if applicable, for exposed and unexposed groups in cohort and cross-sectional studies.

**Note:** An Explanation and Elaboration article discusses each checklist item and gives methodological background and published examples of transparent reporting. The STROBE checklist is best used in conjunction with this article (freely available on the Web sites of PLoS Medicine at <http://www.plosmedicine.org/>, Annals of Internal Medicine at <http://www.annals.org/>, and Epidemiology at <http://www.epidem.com/>). Information on the STROBE Initiative is available at [www.strobe-statement.org](http://www.strobe-statement.org).



**Geographical concentration of falciparum malaria treated in the United Kingdom and delay-to-treatment with artesunate in severe cases: an observational study.**

|                                 |                                                                                                                                                                                                                                                                                                                |
|---------------------------------|----------------------------------------------------------------------------------------------------------------------------------------------------------------------------------------------------------------------------------------------------------------------------------------------------------------|
| Journal:                        | <i>BMJ Open</i>                                                                                                                                                                                                                                                                                                |
| Manuscript ID:                  | bmjopen-2012-001854.R1                                                                                                                                                                                                                                                                                         |
| Article Type:                   | Research                                                                                                                                                                                                                                                                                                       |
| Date Submitted by the Author:   | 18-Sep-2012                                                                                                                                                                                                                                                                                                    |
| Complete List of Authors:       | Broderick, Claire; Hospital for Tropical Diseases, Friend, Philip; HPA Malaria Reference Laboratory, Smith, Valerie; HPA Malaria Reference Laboratory, Blaze, Marie; HPA Malaria Reference Laboratory, Gothard, Philip; Hospital for Tropical Diseases, Whitty, Christopher; HPA Malaria Reference Laboratory, |
| <b>Primary Subject Heading</b>: | Infectious diseases                                                                                                                                                                                                                                                                                            |
| Secondary Subject Heading:      | Epidemiology, Pharmacology and therapeutics                                                                                                                                                                                                                                                                    |
| Keywords:                       | Tropical medicine < INTERNAL MEDICINE, Epidemiology < TROPICAL MEDICINE, Geographical mapping < TROPICAL MEDICINE, INFECTIOUS DISEASES, PARASITOLOGY                                                                                                                                                           |
|                                 |                                                                                                                                                                                                                                                                                                                |

SCHOLARONE™  
Manuscripts

Only

1  
2 **Geographical concentration of falciparum malaria treated in the United Kingdom**  
3  
4 **and delay to treatment with artesunate in severe cases: an observational study.**  
5  
6  
7

8 Claire Broderick<sup>1</sup>, Philip Friend<sup>2</sup>, Valerie Smith<sup>2</sup>, Marie Blaze<sup>2</sup>, Philip Gothard<sup>1</sup>, Peter L  
9  
10 Chiodini<sup>1</sup>, Christopher JM Whitty<sup>2</sup>  
11  
12

13  
14  
15 1) Hospital for Tropical Diseases, Capper St, London WC1E 6JB  
16

17 Claire Broderick, Specialist Registrar; Philip Gothard, Consultant Physician.  
18

19 2) HPA Malaria Reference Laboratory, London School of Hygiene & Tropical  
20  
21 Medicine, Keppel St, London WC1B 7HT  
22  
23

24 Philip Friend, IT advisor; Valerie Smith, data manager; Marie Blaze, data manager; Peter  
25  
26 Chiodini, Director and Honorary Professor; Christopher Whitty, Professor and  
27  
28 epidemiologist.  
29  
30

31  
32  
33 Pre-publication correspondence to:  
34

35 Prof. Christopher Whitty  
36

37 Clinical Research Department  
38

39 London School of Hygiene & Tropical Medicine  
40

41 Keppel St.London WC1B 7HT  
42

43 [Christopher.whitty@lshtm.ac.uk](mailto:Christopher.whitty@lshtm.ac.uk)  
44  
45

46  
47  
48 If accepted for publication the corresponding author will be  
49

50 Dr. Claire Broderick  
51

52 The Hospital for Tropical Diseases  
53

54 Capper St.  
55

56 London WC1E 6JB  
57  
58  
59  
60

Clairebroderick@nhs.net

For peer review only

1  
2  
3  
4  
5  
6  
7  
8  
9  
10  
11  
12  
13  
14  
15  
16  
17  
18  
19  
20  
21  
22  
23  
24  
25  
26  
27  
28  
29  
30  
31  
32  
33  
34  
35  
36  
37  
38  
39  
40  
41  
42  
43  
44  
45  
46  
47  
48  
49  
50  
51  
52  
53  
54  
55  
56  
57  
58  
59  
60

## **Abstract**

**Objectives:** To quantify geographical concentration of falciparum malaria cases in the UK at a hospital level. To assess potential delay-to-treatment associated with hub-and-spoke distribution of artesunate in severe cases.

### **Design:**

Observational study using national and hospital data

### **Setting and participants:**

3,520 patients notified to the Malaria Reference Laboratory 2008-2010, 34 patients treated with intravenous artesunate from a tropical diseases centre 2002-2010.

### **Main outcome measures:**

Geographical location of falciparum cases notified in the UK. Diagnosis-to-treatment times for intravenous artesunate.

### **Results**

Eight centres accounted for 43.9% of the UK's total cases; notifications from 107 centres accounted for 10.2% of cases; 51.5% of hospitals seeing malaria notified 5 or fewer cases in 3 years. Centres that saw <10 cases/year treat 26.3% of malaria cases; 6.1% of cases are treated in hospitals seeing < 2 cases/ year. Concentration of falciparum malaria was highest in Greater London (1925, 54.7%), South East (515, 14.6%), East of England (402, 11.4%) and North West (192, 5.4%). The North East and Northern Ireland each notified 5 or fewer cases per year. Median diagnosis-to-treatment time was 1 hour (range 0.5-5) for patients receiving artesunate in the specialist centre; 7.5 hours (range 4-26 ) for patients receiving it in referring hospitals via the hub and spoke system (p 0.02); 25 hours (range 9-



1  
2 45) for patients receiving it on transfer to the regional centre from a referring hospital (p  
3  
4 0.002).  
5  
6  
7

## 8 **Conclusions**

9  
10 Most UK hospitals see few cases of falciparum malaria and geographical distances are  
11 significant. Over 25% of cases are seen in hospitals where malaria is rare, although 60%  
12 are seen in hospitals seeing over 50 cases over 3 years. A hub-and-spoke system  
13 minimises drug wastage and ensures availability in centres seeing most cases but is  
14 associated with treatment delays elsewhere. As with all observational studies, there are  
15 limitations, which are discussed.  
16  
17  
18  
19  
20  
21  
22  
23  
24  
25  
26  
27  
28  
29  
30  
31  
32  
33  
34  
35  
36  
37  
38  
39  
40  
41  
42  
43  
44  
45  
46  
47  
48  
49  
50  
51  
52  
53  
54  
55  
56  
57  
58  
59  
60

## Introduction

Falciparum malaria remains an important cause of morbidity and mortality in returning travelers. In the United Kingdom (UK), there are 1200 to 1600 cases of falciparum malaria annually, most from Africa or Asia, with an overall case-fatality rate of 7.4 per 1000 reported cases<sup>1</sup>. Around 15% of falciparum cases in the UK are “severe” (Malaria Reference Laboratory 2012) based on World Health Organisation (WHO) criteria<sup>2</sup>. Delay to effective treatment and lack of experience of dealing with severe malaria are associated with poor outcome in severe cases<sup>3,4,5</sup>.

Worldwide, parenteral quinine has been the mainstay of treatment for severe falciparum malaria for over a century and was first-line treatment in the last UK treatment guidelines (2007<sup>6</sup>). However, two recent large multicentre randomised control trials have demonstrated a significant mortality reduction with intravenous artesunate versus intravenous quinine in severe falciparum infection in African children (AQUAMAT study<sup>7</sup>) and Asian adults (SEAQUAMAT study<sup>8</sup>). In light of this new evidence, WHO now recommends intravenous artesunate as first-line treatment for severe falciparum infections<sup>2</sup>. It is almost certain the reduced mortality applies also in travellers returning from those regions. Artesunate is also easier to use than intravenous quinine: it can be administered as a bolus rather than an infusion; has no known cardiotoxicity; it is not known to cause hypoglycaemia associated with quinine<sup>8,9</sup>. For these reasons it is likely to replace quinine as the treatment of choice in the United Kingdom and other countries seeing cases of severe malaria once Good Manufacturing Practice (GMP) licenced drug is available.

1  
2  
3  
4  
5  
6  
7  
8  
9  
10  
11  
12  
13  
14  
15  
16  
17  
18  
19  
20  
21  
22  
23  
24  
25  
26  
27  
28  
29  
30  
31  
32  
33  
34  
35  
36  
37  
38  
39  
40  
41  
42  
43  
44  
45  
46  
47  
48  
49  
50  
51  
52  
53  
54  
55  
56  
57  
58  
59  
60

Intravenous artesunate is available in the UK but its use has been limited by restricted availability. Until recently, just one pharmaceutical company, based in Shanghai, was manufacturing the drug for international export. Their product, used in the AQUAMAT and SEAQUAMT trials<sup>7,8</sup>, only gained WHO pre-qualification status in November 2010<sup>10</sup>.

Production is increasing worldwide but parenteral artesunate remains unlicensed for use in the UK. Few hospitals regularly stock intravenous artesunate and national supplies have been limited (June Minton, Hospital for Tropical Diseases, personal communication 2012). Additionally the shelf-life of artesunate (around 18 months) is much lower than for quinine, an operational issue for hospitals which see few cases.

Given the clear outcome advantages of artesunate but its limited availability, two models of drug distribution might be considered: *universal stock in all acute hospitals (blanket coverage)* and a *hub-and-spoke system* where critical stocks are kept in specialist centres and couriered out when needed to hospitals with severe malaria cases. A form of hub-and-spoke system has operated to date.

Minimising delay to effective treatment is essential in severe cases<sup>3,4,11</sup>. Geographical distance is a key consideration for delay. There is existing evidence of geographical clustering of malaria at a regional level<sup>1</sup>, but this is too broad brush to help with decisions on a hub-and-spoke compared to blanket coverage distribution for a drug which many centres will use rarely if at all. In this study, we aim to quantify the geographical concentration of falciparum malaria in the UK at hospital level, using data from the Health Protection Agency Malaria Reference Laboratory. We also examine data from a tertiary tropical diseases centre that operates a hub-and-spoke system to distribute artesunate to referring hospitals, aiming to assess potential delay-to-treatment associated with this system. These data will inform decisions on the optimal means of distributing intravenous

1 artesunate UK-wide. The geographical concentration of cases is also relevant to training  
2 needs for clinical and laboratory staff in the diagnosis and management of malaria. The  
3 approach should also help other countries with imported malaria which do not currently  
4 have universal artesunate coverage (most of them) consider the data they will need for  
5 their decisions.  
6  
7  
8  
9  
10  
11  
12  
13

### 14 Methods

15 Malaria is a notifiable disease in the UK: clinicians are required to report all cases by law.  
16 The Malaria Reference Laboratory (MRL), part of the UK Health Protection Agency (HPA),  
17 maintains the national surveillance database of reported malaria cases in the UK. It  
18 identifies malaria cases from statutory notification through local authorities; through  
19 laboratories sending blood films for diagnostic verification; through clinicians sending  
20 standardised malaria reports to the MRL. When a malaria case is notified, the MRL  
21 contacts the responsible clinician who is asked to complete a data collection form covering  
22 demographic and clinical data, including the notifying hospital's location and the patient's  
23 usual place-of-residence. This passive case detection system has been shown to identify at  
24 least 66% of cases of falciparum malaria in the UK<sup>12</sup> and over 90% of cases in Scotland<sup>13</sup>.  
25  
26  
27  
28  
29  
30  
31  
32  
33  
34  
35  
36  
37  
38  
39  
40  
41

42 The MRL database was used to identify the location of every notified case of falciparum  
43 malaria in the UK in the years 2008, 2009 and 2010. For Greater London, the notifying  
44 hospital's name was recorded given the large number of hospitals; outside Greater  
45 London, the notifying hospital's town was recorded. The patient's usual place-of-residence  
46 was also recorded. Cases were excluded if there was insufficient information to identify  
47 accurately the notifying hospital or town. Where the notifying hospital's location and the  
48 patient's usual place-of-residence differed significantly (eg. notified from Liverpool, place-  
49 of-residence Cardiff), the notifying hospital's location was recorded as case location.  
50  
51  
52  
53  
54  
55  
56  
57  
58  
59  
60

1  
2  
3  
4 Data were anonymised and analysis was performed using EpiInfo and STATA 11. For  
5  
6 each notifying site, the annual frequency of falciparum malaria and the total number of  
7  
8 cases over 3 years was calculated. Using the decimal geographic coordinates of each  
9  
10 notifying site, maps showing the geographical distribution of falciparum malaria within the  
11  
12 UK and within each UK region, weighted for caseload, were generated. Cases were also  
13  
14 analysed by the UK Government Office Region from which they were reported (North East,  
15  
16 North West, Yorkshire and the Humber, East Midlands, West Midlands, East of England,  
17  
18 South East, South West, Greater London, Northern Ireland, Scotland and Wales)<sup>14</sup>.  
19  
20  
21  
22  
23

24 The Hospital for Tropical Diseases (HTD), London has been using intravenous artesunate  
25  
26 in cases of severe malaria since 2002 and provides a hub-and-spoke distribution service.  
27  
28 It arranges for intravenous artesunate to be couriered from its permanent stocks to  
29  
30 referring hospitals via its Tropical Medicine telephone advice service when requested  
31  
32 based on clinical need. HTD's Pharmacy records were used to identify inpatients treated  
33  
34 with intravenous artesunate at any hospital (including HTD) between 2002 and August  
35  
36 2010. The referring hospitals' pharmacies were contacted and patient identities confirmed.  
37  
38 Patients' medical and laboratory records were reviewed after seeking appropriate  
39  
40 permission from the hospitals. A standardised proforma was used to record the following  
41  
42 for every patient: demographics; parasitaemia; clinical features of severity (based on WHO  
43  
44 criteria<sup>2</sup>) initial anti-malarial used; time of malaria diagnosis; time of first treatment with  
45  
46 intravenous artesunate. All data were anonymised.  
47  
48  
49  
50  
51  
52

53 The diagnosis-to-treatment time was calculated for each case (time from the diagnosis of  
54  
55 severe malaria as documented in the notes to time of first dose of intravenous artesunate  
56  
57 as signed for on the drug chart). Difference between cases treated in a hospital with  
58  
59  
60



1 centres which saw less than 2 patients a year, many of which were some way from a  
2 potential hub (Table 2 and maps).  
3  
4  
5  
6  
7

8 *Intravenous artesunate via hub-and-spoke and time-to treatment.*  
9

10  
11  
12  
13  
14  
15  
16  
17  
18  
19  
20  
21  
22  
23  
24  
25  
26  
27  
28  
29  
30  
31  
32  
33  
34  
35  
36  
37  
38  
39  
40  
41  
42  
43  
44  
45  
46  
47  
48  
49  
50  
51  
52  
53  
54  
55  
56  
57  
58  
59  
60  
HTD pharmacy records identified 50 patients who started intravenous artesunate, 22 at  
HTD. Clinical data were available for 21 of these HTD cases (one case missing medical  
records), 14 of whom were transferred in from referring hospitals. Records identified 28  
patients in referring hospitals treated with intravenous artesunate sent from HTD. Of these  
13 could be included in this study (8 cases had incomplete patient identifiers; 7 cases  
incomplete medical records). 10 patients were in London hospitals, 2 in the South East  
and 1 in Eastern England. Therefore, 34 patients were included in total: 21 men and 13  
women, age range 17- 70 years, median age 41 years. All were resident in the UK. 23  
(68%) had returned from West Africa, 9 (26%) from East Africa, 1 from Central Africa (3%),  
1 from Thailand (3%). High parasite count was the most common criterion for starting  
intravenous artesunate: 29 of the 34 had a count greater than 2% on admission; 24 had a  
count greater than 5%. On presentation, 12 had cerebral malaria (35%), 10 had  
respiratory distress (29%), 6 had acute renal impairment (18%) and 12 (35%) had 2 or  
more clinical features of severe malaria (Table 3).

In 23 cases (68%) the diagnosis-to-treatment time could be calculated (data unavailable  
for the remaining 11 cases). For 4/4 patients admitted to HTD with severe malaria, median  
time was 1 hour, range 0.5 to 5 hours. For 9/13 patients who required artesunate to be  
couriered to their referring hospital, median time was 7.5 hours, range 4 to 26 hours,  
difference from the four treated in a hospital with drug stocks (HTD) of p 0.02 (Rank Sum).  
For 10/14 patients who presented elsewhere but were transferred to and given artesunate

1 at HTD, median time was 25 hours, range 9 to 45 hours, difference from the patients  
2 where artesunate was couriered p 0.002. For 25/26 patients admitted to a referring  
3 hospital, intravenous quinine was given while they waited for intravenous artesunate. One  
4 patient did not receive any anti-malarial on initial diagnosis of severe malaria and waited 4  
5 hours before receiving intravenous artesunate (Table 3).  
6  
7  
8  
9  
10  
11  
12  
13

#### 14 Current cost of drugs.

15  
16  
17  
18  
19 By the standards of emergency life-saving drugs used in high-resource settings,  
20 artesunate is not expensive. Drug wastage associated with universal stockage poses an  
21 opportunity cost while artesunate supplies are limited, as hospitals seeing many cases  
22 may consequently have inadequate drug available.  
23  
24  
25  
26  
27  
28  
29

30  
31 There are however some cost implications, outlined for illustrative purposes (June Minton,  
32 personal communication 2012). A course of 5x 60mg vials (total 300mg) of artesunate at  
33 2012 prices costs £287. A 60kg adult would require 144mg per dose, so would need 1.5  
34 packs in the first 48 hours including loading, costing £381. For IV quinine a pack of 10x  
35 300mg amps (total 3000mg) costs £41. A 60kg adult would require 1200mg loading dose  
36 then 600mg per dose thereafter. Assuming it is given tds, this would require 4200mg in  
37 total for first 48 hours, so about 1.5 packs, costing £61. Each adult treatment course of  
38 artesunate discarded after the expiry date would therefore be around £400 on current  
39 prices.  
40  
41  
42  
43  
44  
45  
46  
47  
48  
49  
50  
51  
52  
53  
54  
55  
56  
57  
58  
59  
60



## Discussion

This study shows that whilst the majority of UK patients with malaria are seen in centres which see many cases of malaria, a significant minority are seen in centres where malaria is rarely seen, and 216 cases (6.1%) were seen in centres which saw fewer than 2 cases a year. Since 5-15% of cases of falciparum malaria probably become severe (although data on this are not reliable)<sup>15</sup> these centres will probably treat a severe case less than once every 5 years. There are 168 acute trusts in the UK and 171 centres reporting malaria over the three years, so it is seen occasionally in the majority of UK hospitals. A hub-and-spoke system for distributing artesunate was unsurprisingly associated with delays in starting treatment- in this study of a relatively limited number of patients of around 7 hours.

The degree of clustering of malaria cases in hospitals has significant operational implications. These include whether rarely used but important drugs, especially parenteral artesunate, are distributed universally or by hub-and-spoke. It also has important implications for clinical care standards and training since malaria mortality is inversely related to experience at least at a regional level in the UK<sup>5</sup>, a pattern which is almost certainly seen in other non-endemic countries. Identifying training needs and providing support for hospitals with less experience of malaria is important for minimising delays in diagnosis and improving clinical outcomes.

This hospital-level study is consistent with previous studies on the incidence of malaria in the UK regions<sup>1,5</sup> and likely reflects the UK's demographics and travelling patterns. Outside London, the South East and East of England, the frequency of falciparum malaria was low. Together, the North East, Scotland, Wales and Northern Ireland accounted for less than 4% of all cases. The North East of England and Northern Ireland each notified

1 approximately 3 cases of falciparum malaria per year. The MRL capture rate is 66% so we  
2 estimate these regions may each see 4 to 5 cases of falciparum malaria per year.

3  
4  
5 Assuming 5-15% of falciparum cases become “severe”, we estimate each of these UK  
6  
7 regions could expect to use intravenous artesunate once every 1 to 2 years. In Wales and  
8  
9 Scotland we estimate it might be used 3 to 4 times per year, with most hospitals using no  
10  
11 drug but long geographical distances between hospitals.  
12  
13

14  
15  
16  
17 UK intravenous artesunate supplies have been limited for several years for operational  
18  
19 and regulatory reasons, and it is unlikely this will be resolved soon. Until supplies improve,  
20  
21 the UK and other non-endemic countries will need to distribute and use the drug efficiently  
22  
23 and effectively. Intravenous artesunate has a shelf-life of around 18 months. Our data  
24  
25 suggest that a universal stock system would lead to substantial drug wastage: more than  
26  
27 50% of UK centres with at least one case notified 5 or fewer cases of falciparum malaria  
28  
29 over 3 years and will seldom see severe cases; 2 UK regions notified less than 10 cases  
30  
31 over 3 years. On the other hand, as our data shows, a hub-and-spoke system will lead to  
32  
33 delays in providing artesunate, and since this has been associated with over 20%  
34  
35 reduction in mortality in adults such a delay is likely to be fatal in at least some cases.  
36  
37  
38  
39  
40  
41  
42  
43

#### 44 Limitations:

45  
46 The MRL uses a passive case detection system, which relies on the clinician or laboratory  
47  
48 to report malaria cases. Therefore under-reporting is inevitable: however a capture-  
49  
50 recapture study estimated that 66% of falciparum cases in England are detected by this  
51  
52 system<sup>12</sup> which is high by international standards. Case-detection rate may vary by  
53  
54 hospital or region as some units may disproportionately under-report cases. For example,  
55  
56 the same study found that London had a higher detection rate than the rest of England.  
57  
58  
59  
60

1 Hospitals that rarely see malaria may be less familiar with reporting systems; so this study  
2 may underestimate the proportion of the UK's malaria cases seen in these centres.  
3  
4 Scotland has been shown to have a very high case detection rate (over 90%<sup>13</sup>).  
5  
6  
7  
8  
9

10 Of 34 cases excluded due to incomplete data on case location, 26 were from Scotland.  
11  
12 These cases represent a significant proportion of the total number of Scottish cases; they  
13 would not have a significant impact on the overall trends described here but make  
14 extrapolating results to Scotland difficult. The Royal Liverpool Hospital and the Hospital for  
15 Tropical Diseases are national centres for Tropical Medicine, regularly receiving patients  
16 and malaria films from throughout the UK. In 98/127 Liverpool cases and 45/266 HTD  
17 cases included in this study, the notifier's location and the patient's usual place-of-  
18 residence were located in different counties or regions, including Greater Manchester,  
19 South West England, Scotland and Wales. It was not clear which of these cases  
20 represented referrals and which represented temporary visitors so all Liverpool  
21 notifications were coded as "Liverpool" and all HTD notifications as "HTD". Some of these  
22 patients may have presented elsewhere initially.  
23  
24  
25  
26  
27  
28  
29  
30  
31  
32  
33  
34  
35  
36  
37  
38  
39

40 HTD operates probably the largest hub-and-spoke distribution system for intravenous  
41 artesunate in the UK. Despite this, the number of cases that could be included was small:  
42 34/50 patients receiving intravenous artesunate during this time period could be included  
43 in this study. The data we have are retrospective. To calculate the diagnosis-to-treatment  
44 time, we used the times as documented in the medical records. Clinicians do not always  
45 document decisions or diagnoses immediately, so the diagnosis-to-treatment times may  
46 appear shorter in this study, which is therefore conservative on delay which may well in  
47 practice be longer than recorded.  
48  
49  
50  
51  
52  
53  
54  
55  
56  
57  
58  
59  
60

## Conclusions

If intravenous artesunate becomes first-line treatment for severe malaria in Europe, UK hospitals will require rapid and reliable access to this emergency drug. While artesunate supplies remain limited, a hub-and-spoke system, based around regional infection centres will minimise drug wastage and ensure the drug is available in the centres which see most cases, but will lead to delays, and almost certainly some avoidable deaths in centres which less regularly see cases and are geographically some way from hubs. A system which restricts artesunate to hospitals that see over 100 cases in 3 years would lead to two-thirds of cases being in other centres. Even having artesunate in the 31 hospitals that see more than 50 cases in 3 years would leave over 25% of malaria cases being treated elsewhere. When parenteral artesunate becomes more freely available, these data suggest the UK should move rapidly towards universal drug distribution, aiming for all acute hospitals to maintain permanent stocks, to ensure early artesunate treatment for all UK severe malaria cases.

## **Acknowledgements.**

The authors would like to acknowledge funding for the Malaria Reference Laboratory from the Health Protection Agency, and additional support from the Special Trustees of the Hospital for Tropical Diseases. Funders had no part in design, analysis or decision to publish. PLC and CJMW are part of the Malaria Centre, LSHTM. PLC is supported by the UCL Hospitals Comprehensive Biomedical Research Centre Infection Theme.

Table 1*Reported cases of falciparum malaria by UK region, 2008-2010*

|                               | 2008   |            | 2009   |            | 2010   |            | All 3 years |            |
|-------------------------------|--------|------------|--------|------------|--------|------------|-------------|------------|
|                               | Number | % of total | Number | % of total | Number | % of total | Number      | % of total |
| <b>North East</b>             | 1      | 0.1        | 4      | 0.3        | 5      | 0.4        | 10          | 0.3        |
| <b>North West</b>             | 49     | 4.5        | 58     | 5          | 85     | 6.7        | 192         | 5.4        |
| <b>Yorkshire &amp; Humber</b> | 19     | 1.8        | 26     | 2.2        | 53     | 4.2        | 98          | 2.8        |
| <b>East Midlands</b>          | 15     | 1.4        | 18     | 1.5        | 34     | 2.7        | 67          | 1.9        |
| <b>West Midlands</b>          | 27     | 2.5        | 45     | 3.8        | 53     | 4.2        | 125         | 3.6        |
| <b>East of England</b>        | 140    | 12.9       | 124    | 10.6       | 138    | 10.9       | 402         | 11.4       |
| <b>South East</b>             | 164    | 15.1       | 161    | 13.7       | 190    | 15.1       | 515         | 14.6       |
| <b>South West</b>             | 30     | 2.8        | 24     | 2.1        | 34     | 2.7        | 88          | 2.5        |
| <b>Greater London</b>         | 614    | 56.6       | 682    | 58.1       | 629    | 49.9       | 1925        | 54.7       |
| <b>Scotland</b>               | 13     | 1.2        | 18     | 1.5        | 22     | 1.7        | 53          | 1.5        |
| <b>Wales</b>                  | 10     | 0.9        | 10     | 0.9        | 16     | 1.3        | 36          | 1          |
| <b>Northern Ireland</b>       | 2      | 0.2        | 4      | 0.3        | 3      | 0.2        | 9           | 0.3        |
| <b>Total</b>                  | 1084   |            | 1174   |            | 1262   |            | 3520        |            |

**Table 2***Number of UK hospitals notifying cases of falciparum malaria, 2008-2010*

| <b>Number of cases notified in 3 years</b> | <b>Number of centres</b> | <b>Total number of cases</b> | <b>% of UK total cases</b> | <b>Cumulative % of UK cases</b> |
|--------------------------------------------|--------------------------|------------------------------|----------------------------|---------------------------------|
| <b>&gt;100</b>                             | 8                        | 1547                         | 43.9                       | 43.9                            |
| <b>51-100</b>                              | 8                        | 552                          | 15.7                       | 59.6                            |
| <b>26-50</b>                               | 15                       | 497                          | 14.1                       | 73.7                            |
| <b>11-25</b>                               | 33                       | 565                          | 16.1                       | 89.8                            |
| <b>6-10</b>                                | 19                       | 143                          | 4.1                        | 93.9                            |
| <b>1-5</b>                                 | 88                       | 216                          | 6.1                        | 100                             |

For peer review only

**Table 3***Falciparum* cases treated with intravenous artesunate from the Hospital for Tropical Diseases

| Age | Gender | County of residence | Country of travel | Parasitaemia on admission | Number of clinical features of severity | Admitting hospital | Site of first artesunate dose | Diagnosis-to-treatment time (hrs) | Initial anti-malarial       |
|-----|--------|---------------------|-------------------|---------------------------|-----------------------------------------|--------------------|-------------------------------|-----------------------------------|-----------------------------|
| 57  | M      | UK                  | Nigeria           | 2.3                       | 1                                       | Elsewhere          | Elsewhere                     | 12                                | iv quinine & doxycycline    |
| 41  | M      | UK                  | Gambia            | 15                        | 6                                       | Elsewhere          | Elsewhere                     | 13                                | iv quinine                  |
| 34  | F      | UK                  | Nigeria           | 37                        | 1                                       | Elsewhere          | HTD                           | 14                                | iv quinine                  |
| 45  | M      | UK                  | Gambia & Liberia  | 27                        | 0                                       | Elsewhere          | HTD                           | 41.5                              | iv quinine                  |
| 51  | M      | UK                  | Nigeria           | 15                        | 3                                       | Elsewhere          | HTD                           | 13                                | iv quinine                  |
| 62  | F      | UK                  | Ghana             | 17                        | 0                                       | Elsewhere          | Elsewhere                     | 5                                 | iv quinine                  |
| 38  | M      | UK                  | Nigeria           | 8                         | 1                                       | Elsewhere          | Elsewhere                     | 26                                | iv quinine & im artemether  |
| 24  | F      | UK                  | Uganda            | 2.7                       | 0                                       | HTD                | HTD                           | 1                                 | iv artesunate               |
| 24  | M      | UK                  | Thailand          | 2.6                       | 0                                       | Elsewhere          | HTD                           | 29                                | iv quinine                  |
| 39  | M      | UK                  | Kenya             | 23                        | 3                                       | Elsewhere          | Elsewhere                     | 4.5                               | iv quinine                  |
| 46  | M      | UK                  | Nigeria           | 8.1                       | 2                                       | Elsewhere          | HTD                           | 34                                | iv quinine                  |
| 41  | M      | UK                  | Uganda            | 2.3                       | 2                                       | Elsewhere          | HTD                           | 9                                 | iv quinine                  |
| 47  | F      | UK                  | Mozambique        | 0.2 (recurrence)          | 0                                       | HTD                | HTD                           | 5                                 | iv artesunate               |
| 46  | M      | UK                  | Sudan             | 20                        | 2                                       | Elsewhere          | Elsewhere                     | 8                                 | iv quinine                  |
| 45  | F      | UK                  | Uganda            | 1.8                       | 1                                       | Elsewhere          | HTD                           | 45                                | iv quinine                  |
| 42  | M      | UK                  | Nigeria           | 1                         | 0                                       | HTD                | HTD                           | 3.5                               | iv artesunate               |
| 36  | M      | UK                  | Nigeria           | 0.3                       | 1                                       | HTD                | HTD                           | 1                                 | iv artesunate               |
| 49  | M      | UK                  | DR Congo          | 15                        | 1                                       | HTD                | HTD                           | 5                                 | iv quinine                  |
| 17  | M      | UK                  | Sierra Leone      | 1.1                       | 0                                       | HTD                | HTD                           | 11                                | iv quinine                  |
| 52  | F      | UK                  | Ghana             | 50                        | 4                                       | Elsewhere          | Elsewhere                     | Unknown                           | iv quinine                  |
| 34  | F      | UK                  | Ghana             | 22                        | 4                                       | Elsewhere          | Elsewhere                     | 4                                 | iv artesunate & clindamycin |

|    |   |    |                     |      |   |           |           |         |                          |
|----|---|----|---------------------|------|---|-----------|-----------|---------|--------------------------|
| 52 | F | UK | Sierra Leone        | 5.2  | 0 | Elsewhere | Elsewhere | Unknown | Unknown                  |
| 27 | F | UK | Tanzania            | 5    | 0 | Elsewhere | HTD       | Unknown | iv quinine               |
| 52 | M | UK | Kenya               | 10   | 1 | Elsewhere | HTD       | 33      | iv quinine               |
| 36 | M | UK | Gabon               | 17.2 | 0 | HTD       | HTD       | 0.5     | iv artesunate            |
| 41 | F | UK | Ghana               | 10   | 1 | Elsewhere | Elsewhere | 7.5     | iv quinine & doxycycline |
| 35 | F | UK | Ghana & Ivory Coast | 9    | 0 | Elsewhere | Elsewhere | Unknown | iv quinine               |
| 70 | M | UK | Nigeria             | 8    | 1 | Elsewhere | Elsewhere | Unknown | iv quinine               |
| 51 | M | UK | Nigeria             | 9.2  | 0 | Elsewhere | Elsewhere | 5       | iv quinine               |
| 39 | M | UK | Uganda              | 30   | 2 | Elsewhere | HTD       | Unknown | iv quinine               |
| 31 | F | UK | Nigeria             | 4.8  | 1 | Elsewhere | HTD       | Unknown | iv quinine               |
| 30 | M | UK | Sierra Leone        | 26.8 | 2 | Elsewhere | HTD       | 21.5    | iv quinine               |
| 47 | F | UK | Sierra Leone        | 12.5 | 2 | Elsewhere | HTD       | 14.5    | iv quinine               |
| 43 | M | UK | Ghana               | 16.4 | 3 | Elsewhere | HTD       | Unknown | iv quinine               |



## References

- 1  
2  
3  
4  
5  
6 <sup>1</sup>Smith A, Bradley D, Smith V, Blaze M, Behrens R, Chiodini P et al. Imported malaria and high risk  
7 groups: observational study using UK surveillance data 1987-2006. *BMJ* 2008; 337:a120
- 8  
9 <sup>2</sup> World Health Organization. Guidelines for the treatment of malaria. *2nd ed.* Geneva: The World  
10 Health Organization; 2010
- 11  
12 <sup>3</sup> Newman RD, Parise ME, Barber AM, Steketee RW. Malaria-related deaths among U.S. travelers,  
13 1963-2001. *Ann Intern Med* 2004; 141(7): 547-55
- 14  
15 <sup>4</sup> Christen D, Steffen R, Schlagenhauf P. Deaths caused by malaria in Switzerland 1988-2002. *Am*  
16 *J Trop Med Hyg* 2006; 75(6): 1188-94.
- 17  
18 <sup>5</sup> Checkley A, Smith A, Smith V, Blaze M, Bradley D et al. Risk factors for mortality from imported  
19 falciparum malaria in the United Kingdom over 20 years: an observational study. *BMJ* 2012; 344:  
20 e2116
- 21  
22 <sup>6</sup> Lalloo DG, Shingadia D, Pasvol G, Chiodini PL, Whitty CJM, Beeching NJ et al. UK malaria  
23 treatment guidelines. *J Infect.* 2007; 54(2): 111-21
- 24  
25 <sup>7</sup> Dondorp A, Fanello C, Hendriksen I, Gomes E, Seni A, Chhaganlal K et al. Artesunate versus  
26 quinine in the treatment of severe falciparum malaria in African children (AQUAMAT): an open-  
27 label, randomised trial. *Lancet* 2010; 376: 1647-57
- 28  
29 <sup>8</sup> Dondorp A, Nosten F, Stepniewska K, Day N, White N at al. Artesunate versus quinine for  
30 treatment of severe falciparum malaria: a randomised trial. *Lancet* 2005; 366: 717-25
- 31  
32 <sup>9</sup> Newton PN, Angus BJ, Chierakul W, Dondorp A, Ruangveerayuth R, Silamut K et al.  
33 Randomised comparison of artesunate and quinine in the treatment of severe falciparum malaria.  
34 *Clin Infect Dis* 2003; 37(1): 7-16.
- 35  
36 <sup>10</sup> World Health Organization. *Prequalification programme: a United Nations programme managed*  
37 *by WHO, 2010.* <http://apps.who.int/prequal/>
- 38  
39 <sup>11</sup> Gomes MF, Faiz MA, Gyapong JO, Warsame M, Agbenyega T, Babiker A et al. Pre-referral  
40 rectal artesunate to prevent death and disability in severe malaria: a placebo-controlled trial.  
41 *Lancet.* 2009; 373: 557-66.
- 42  
43 <sup>12</sup> Cathcart SJ, Lawrence J, Grant A, Quinn D, Whitty CJ, Jones J et al. Estimating unreported  
44 malaria cases in England: a capture-recapture study. *Epidemiol Infect* 2010; 138(7): 1052-8
- 45  
46 <sup>13</sup> Unger HW, McCallum AD, Ukachukwu V, McGoldrick C, Perrow K, Latin G, Norrie G,  
47 Morris S, Smith CC, Jones ME. Imported malaria in Scotland--an overview of  
48 surveillance, reporting and trends. *Travel Med Infect Dis.* 2011; 9(6): 289-97.
- 49  
50 <sup>14</sup> Office for National Statistics.  
51 [http://www.ons.gov.uk/ons/guide-method/geography/beginner-s-](http://www.ons.gov.uk/ons/guide-method/geography/beginner-s-guide/administrative/england/government-office-regions/index.html)  
52 [guide/administrative/england/government-office-regions/index.html](http://www.ons.gov.uk/ons/guide-method/geography/beginner-s-guide/administrative/england/government-office-regions/index.html)
- 53  
54  
55 <sup>15</sup> Lubell Y, Staedke SG, Greenwood BM, Kanya MR, Molyneux M, Newton PN et al . Likely health  
56 outcomes for untreated acute febrile illness in the tropics in decision and economic models: a  
57 Delphi survey. *PLoS One.* 2011; 6: e17439.
- 58  
59  
60

1  
2 **Geographical concentration of falciparum malaria treated in the United Kingdom**  
3  
4 **and delay to treatment with artesunate in severe cases: an observational study.**  
5  
6  
7

8 Claire Broderick<sup>1</sup>, Philip Friend<sup>2</sup>, Valerie Smith<sup>2</sup>, Marie Blaze<sup>2</sup>, Philip Gothard<sup>1</sup>, Peter L  
9  
10 Chiodini<sup>1</sup>, Christopher JM Whitty<sup>2</sup>  
11

12  
13  
14  
15 1) Hospital for Tropical Diseases, Capper St, London WC1E 6JB  
16

17 Claire Broderick, Specialist Registrar; Philip Gothard, Consultant Physician.  
18

19 2) HPA Malaria Reference Laboratory, London School of Hygiene & Tropical  
20  
21 Medicine, Keppel St, London WC1B 7HT  
22

23  
24 Philip Friend, IT advisor; Valerie Smith, data manager; Marie Blaze, data manager; Peter  
25  
26 Chiodini, Director and Honorary Professor; Christopher Whitty, Professor and  
27  
28 epidemiologist.  
29

30  
31  
32  
33 Pre-publication correspondence to:

34  
35 Prof. Christopher Whitty

36  
37 Clinical Research Department

38  
39 London School of Hygiene & Tropical Medicine

40  
41 Keppel St.London WC1B 7HT

42  
43 [Christopher.whitty@lshtm.ac.uk](mailto:Christopher.whitty@lshtm.ac.uk)  
44  
45

46  
47  
48 If accepted for publication the corresponding author will be

49  
50 Dr. Claire Broderick

51  
52 The Hospital for Tropical Diseases

53  
54 Capper St.

55  
56  
57 London WC1E 6JB  
58  
59  
60

[Clairebroderick@nhs.net](mailto:Clairebroderick@nhs.net)

For peer review only

1  
2  
3  
4  
5  
6  
7  
8  
9  
10  
11  
12  
13  
14  
15  
16  
17  
18  
19  
20  
21  
22  
23  
24  
25  
26  
27  
28  
29  
30  
31  
32  
33  
34  
35  
36  
37  
38  
39  
40  
41  
42  
43  
44  
45  
46  
47  
48  
49  
50  
51  
52  
53  
54  
55  
56  
57  
58  
59  
60

## **Abstract**

**Objectives:** To quantify geographical concentration of falciparum malaria cases in the UK at a hospital level. To assess potential delay-to-treatment associated with hub-and-spoke distribution of artesunate in severe cases.

### **Design:**

Observational study using national and hospital data

### **Setting and participants:**

3,520 patients notified to the Malaria Reference Laboratory 2008-2010, 34 patients treated with intravenous artesunate from a tropical diseases centre 2002-2010.

### **Main outcome measures:**

Geographical location of falciparum cases notified in the UK. Diagnosis-to-treatment times for intravenous artesunate.

### **Results**

Eight centres accounted for 43.9% of the UK's total cases; notifications from 107 centres accounted for 10.2% of cases; 51.5% of hospitals seeing malaria notified 5 or fewer cases in 3 years. Centres that saw <10 cases/year treat 26.3% of malaria cases; 6.1% of cases are treated in hospitals seeing < 2 cases/ year. Concentration of falciparum malaria was highest in Greater London (1925, 54.7%), South East (515, 14.6%), East of England (402, 11.4%) and North West (192, 5.4%). The North East and Northern Ireland each notified 5 or fewer cases per year. Median diagnosis-to-treatment time was 1 hour (range 0.5-5) for patients receiving artesunate in the specialist centre; 7.5 hours (range 4-26 ) for patients receiving it in referring hospitals via the hub and spoke system (p 0.02); 25 hours (range 9-

1  
2 45) for patients receiving it on transfer to the regional centre from a referring hospital (p  
3  
4 0.002).  
5  
6  
7

## 8 **Conclusions**

9  
10 Most UK hospitals see few cases of falciparum malaria and geographical distances are  
11 significant. Over 25% of cases are seen in hospitals where malaria is rare, although 60%  
12 are seen in hospitals seeing over 50 cases over 3 years. A hub-and-spoke system  
13 minimises drug wastage and ensures availability in centres seeing most cases but is  
14 associated with treatment delays elsewhere. As with all observational studies, there are  
15 limitations, which are discussed.  
16  
17  
18  
19  
20  
21  
22  
23  
24  
25  
26  
27  
28  
29  
30  
31  
32  
33  
34  
35  
36  
37  
38  
39  
40  
41  
42  
43  
44  
45  
46  
47  
48  
49  
50  
51  
52  
53  
54  
55  
56  
57  
58  
59  
60

## Introduction

Falciparum malaria remains an important cause of morbidity and mortality in returning travelers. In the **United Kingdom (UK)**, there are 1200 to 1600 cases of falciparum malaria annually, most from Africa or Asia, with an overall case-fatality rate of 7.4 per 1000 reported cases<sup>1</sup>. Around 15% of falciparum cases in the UK are “severe” (Malaria Reference Laboratory 2012) based on **World Health Organisation (WHO) criteria**<sup>2</sup>. Delay to effective treatment and lack of experience of dealing with severe malaria are associated with poor outcome in severe cases<sup>3,4,5</sup>.

Worldwide, parenteral quinine has been the mainstay of treatment for severe falciparum malaria for over a century and was first-line treatment in the last UK treatment guidelines (2007<sup>6</sup>). However, two recent large multicentre randomised control trials have demonstrated a significant mortality reduction with intravenous artesunate versus intravenous quinine in severe falciparum infection in African children (**AQUAMAT study**<sup>7</sup>) and Asian adults (**SEAQUAMAT study**<sup>8</sup>). In light of this new evidence, WHO now recommends intravenous artesunate as first-line treatment for severe falciparum infections<sup>2</sup>. It is almost certain the reduced mortality applies also in travellers returning from those regions. Artesunate is also easier to use than intravenous quinine: it can be administered as a bolus rather than an infusion; has no known cardiotoxicity; it is not known to cause hypoglycaemia associated with quinine<sup>8,9</sup>. For these reasons it is likely to replace quinine as the treatment of choice in the United Kingdom and other countries seeing cases of severe malaria once **Good Manufacturing Practice (GMP)** licenced drug is available.

1  
2  
3  
4  
5  
6  
7  
8  
9  
10  
11  
12  
13  
14  
15  
16  
17  
18  
19  
20  
21  
22  
23  
24  
25  
26  
27  
28  
29  
30  
31  
32  
33  
34  
35  
36  
37  
38  
39  
40  
41  
42  
43  
44  
45  
46  
47  
48  
49  
50  
51  
52  
53  
54  
55  
56  
57  
58  
59  
60

Intravenous artesunate is available in the UK but its use has been limited by restricted availability. Until recently, just one pharmaceutical company, based in Shanghai, was manufacturing the drug for international export. Their product, used in the AQUAMAT and SEAQUAMT trials<sup>7,8</sup>, only gained WHO pre-qualification status in November 2010<sup>10</sup>.

Production is increasing worldwide but parenteral artesunate remains unlicensed for use in the UK. Few hospitals regularly stock intravenous artesunate and national supplies have been limited (June Minton, Hospital for Tropical Diseases, personal communication 2012). Additionally the shelf-life of artesunate (around 18 months) is much lower than for quinine, an operational issue for hospitals which see few cases.

Given the clear outcome advantages of artesunate but its limited availability, two models of drug distribution might be considered: *universal stock in all acute hospitals (blanket coverage)* and a *hub-and-spoke system* where critical stocks are kept in specialist centres and couriered out when needed to hospitals with severe malaria cases. A form of hub-and-spoke system has operated to date.

Minimising delay to effective treatment is essential in severe cases<sup>3,4,11</sup>. Geographical distance is a key consideration for delay. There is existing evidence of geographical clustering of malaria at a regional level<sup>1</sup>, but this is too broad brush to help with decisions on a hub-and-spoke compared to blanket coverage distribution for a drug which many centres will use rarely if at all. In this study, **we aim to quantify** the geographical concentration of falciparum malaria in the UK at hospital level, using data from the Health Protection Agency Malaria Reference Laboratory. We also examine data from a tertiary tropical diseases centre that operates a hub-and-spoke system to distribute artesunate to referring hospitals, **aiming to assess potential delay-to-treatment** associated with this system. These data will inform decisions on the optimal means of distributing intravenous

1 artesunate UK-wide. The geographical concentration of cases is also relevant to training  
2 needs for clinical and laboratory staff in the diagnosis and management of malaria. The  
3 approach should also help other countries with imported malaria which do not currently  
4 have universal artesunate coverage (most of them) consider the data they will need for  
5 their decisions.  
6  
7  
8  
9  
10  
11  
12  
13

### 14 Methods

15 Malaria is a notifiable disease in the UK: clinicians are required to report all cases by law.  
16 The Malaria Reference Laboratory (MRL), part of the UK Health Protection Agency (HPA),  
17 maintains the national surveillance database of reported malaria cases in the UK. It  
18 identifies malaria cases from statutory notification through local authorities; through  
19 laboratories sending blood films for diagnostic verification; through clinicians sending  
20 standardised malaria reports to the MRL. When a malaria case is notified, the MRL  
21 contacts the responsible clinician who is asked to complete a data collection form covering  
22 demographic and clinical data, including the notifying hospital's location and the patient's  
23 usual place-of-residence. This passive case detection system has been shown to identify at  
24 least 66% of cases of falciparum malaria in the UK<sup>12</sup> and over 90% of cases in Scotland<sup>13</sup>.  
25  
26  
27  
28  
29  
30  
31  
32  
33  
34  
35  
36  
37  
38  
39  
40  
41

42 The MRL database was used to identify the location of every notified case of falciparum  
43 malaria in the UK in the years 2008, 2009 and 2010. For Greater London, the notifying  
44 hospital's name was recorded given the large number of hospitals; outside Greater  
45 London, the notifying hospital's town was recorded. The patient's usual place-of-residence  
46 was also recorded. Cases were excluded if there was insufficient information to identify  
47 accurately the notifying hospital or town. Where the notifying hospital's location and the  
48 patient's usual place-of-residence differed significantly (eg. notified from Liverpool, place-  
49 of-residence Cardiff), the notifying hospital's location was recorded as case location.  
50  
51  
52  
53  
54  
55  
56  
57  
58  
59  
60



1  
2  
3  
4 Data were anonymised and analysis was performed using EpiInfo and STATA 11. For  
5  
6 each notifying site, the annual frequency of falciparum malaria and the total number of  
7  
8 cases over 3 years was calculated. Using the decimal geographic coordinates of each  
9  
10 notifying site, maps showing the geographical distribution of falciparum malaria within the  
11  
12 UK and within each UK region, weighted for caseload, were generated. Cases were also  
13  
14 analysed by the UK Government Office Region from which they were reported (North East,  
15  
16 North West, Yorkshire and the Humber, East Midlands, West Midlands, East of England,  
17  
18 South East, South West, Greater London, Northern Ireland, Scotland and Wales)<sup>14</sup>.  
19  
20  
21  
22  
23

24 The Hospital for Tropical Diseases (HTD), London has been using intravenous artesunate  
25  
26 in cases of severe malaria since 2002 and provides a hub-and-spoke distribution service.  
27  
28 It arranges for intravenous artesunate to be couriered from its permanent stocks to  
29  
30 referring hospitals via its Tropical Medicine telephone advice service when requested  
31  
32 based on clinical need. HTD's Pharmacy records were used to identify inpatients treated  
33  
34 with intravenous artesunate at any hospital (including HTD) between 2002 and August  
35  
36 2010. The referring hospitals' pharmacies were contacted and patient identities confirmed.  
37  
38 Patients' medical and laboratory records were reviewed after seeking appropriate  
39  
40 permission from the hospitals. A standardised proforma was used to record the following  
41  
42 for every patient: demographics; parasitaemia; clinical features of severity (based on WHO  
43  
44 criteria<sup>2</sup>) initial anti-malarial used; time of malaria diagnosis; time of first treatment with  
45  
46 intravenous artesunate. All data were anonymised.  
47  
48  
49  
50  
51  
52

53 The diagnosis-to-treatment time was calculated for each case (time from the diagnosis of  
54  
55 severe malaria as documented in the notes to time of first dose of intravenous artesunate  
56  
57 as signed for on the drug chart). Difference between cases treated in a hospital with  
58  
59  
60

1 stocks, hospitals where artesunate was couriered and differences with hospitals which  
2 transferred patients were calculated by the Wilcoxon Rank Sum test.  
3  
4

5  
6  
7  
8 Results:  
9

10  
11  
12 Geographical clustering of cases in the UK  
13

14  
15  
16  
17 Of 3556 cases of falciparum malaria notified to the MRL between 2008 and 2010: 1096  
18 cases were in 2008; 1185 cases in 2009; 1275 cases in 2010. We excluded 12 cases from  
19 2008 (9 Scotland, 1 Berkshire, 2 London); 11 cases from 2009 (9 Scotland, 2 London); 13  
20 cases from 2010: (8 Scotland, 1 West Yorkshire, 2 London, 1 Surrey, 1 Somerset) due to  
21 incomplete geographical data, so in total 3520 cases are included in this study.  
22  
23  
24  
25  
26  
27

28  
29  
30 Of these cases, 54.7% were notified from London, 14.6% from the South East, 11.4% from  
31 Eastern England, 5.5% from the North West. Together, the North East of England and  
32 Northern Ireland accounted for just 0.6% of cases, each notifying 5 or fewer cases per  
33 year (Table 1). Within all regions, cases were clustered around larger towns and cities and  
34 these are plotted out for the UK (Map 1), England (Map 2), the North West and West  
35 Midlands (Map 3), the South East and East of England (Map 4) and Greater London (Map  
36 5).  
37  
38  
39  
40  
41  
42  
43  
44  
45  
46  
47

48 Over the three years studied, eight centres notified more than 100 cases (6 Greater  
49 London hospitals, Croydon and Liverpool). Cases from these eight centres made up  
50 43.9% of the UK's total cases. Notifications from 31 centres accounted for 73.7% of the  
51 UK's total; 18 of these were Greater London hospitals. In contrast, 140 centres that saw  
52 fewer than a case a month saw 26% of cases (924), and 6% of cases were seen in  
53  
54  
55  
56  
57  
58  
59  
60

1 centres which saw less than 2 patients a year, many of which were some way from a  
2 potential hub (Table 2 and maps).  
3  
4  
5  
6  
7

8 *Intravenous artesunate via hub-and-spoke and time-to treatment.*  
9

10  
11  
12  
13  
14  
15  
16  
17  
18  
19  
20  
21  
22  
23  
24  
25  
26  
27  
28  
29  
30  
31  
32  
33  
34  
35  
36  
37  
38  
39  
40  
41  
42  
43  
44  
45  
46  
47  
48  
49  
50  
51  
52  
53  
54  
55  
56  
57  
58  
59  
60

HTD pharmacy records identified 50 patients who started intravenous artesunate, 22 at  
HTD. **Clinical data were available for 21 of these HTD cases** (one case missing medical  
records), 14 of whom were transferred in from referring hospitals. Records identified 28  
patients in referring hospitals treated with intravenous artesunate sent from HTD. Of these  
13 could be included in this study (8 cases had incomplete patient identifiers; 7 cases  
incomplete medical records). 10 patients were in London hospitals, 2 in the South East  
and 1 in Eastern England. Therefore, 34 patients were included in total: 21 men and 13  
women, age range 17- 70 years, median age 41 years. **All were resident in the UK. 23  
(68%) had returned from West Africa, 9 (26%) from East Africa, 1 from Central Africa (3%),  
1 from Thailand (3%).** High parasite count was the most common criterion for starting  
intravenous artesunate: 29 of the 34 had a count greater than 2% on admission; 24 had a  
count greater than 5%. On presentation, 12 had cerebral malaria (35%), 10 had  
respiratory distress (29%), 6 had acute renal impairment (18%) and 12 (35%) had 2 or  
more clinical features of severe malaria (Table 3).

In 23 cases (68%) the diagnosis-to-treatment time could be calculated (**data unavailable  
for the remaining 11 cases**). For 4/4 patients admitted to HTD with severe malaria, median  
time was 1 hour, range 0.5 to 5 hours. For 9/13 patients who required artesunate to be  
couriered to their referring hospital, median time was 7.5 hours, range 4 to 26 hours,  
difference from the four treated in a hospital with drug stocks (HTD) of p 0.02 (Rank Sum).  
For 10/14 patients who presented elsewhere but were transferred to and given artesunate

1 at HTD, median time was 25 hours, range 9 to 45 hours, difference from the patients  
2 where artesunate was couriered p 0.002. For 25/26 patients admitted to a referring  
3 hospital, intravenous quinine was given while they waited for intravenous artesunate. One  
4 patient did not receive any anti-malarial on initial diagnosis of severe malaria and waited 4  
5 hours before receiving intravenous artesunate (Table 3).  
6  
7  
8  
9  
10  
11  
12  
13

#### 14 Current cost of drugs.

15  
16  
17  
18  
19 By the standards of emergency life-saving drugs used in high-resource settings,  
20 artesunate is not expensive. Drug wastage associated with universal stockage poses an  
21 opportunity cost while artesunate supplies are limited, as hospitals seeing many cases  
22 may consequently have inadequate drug available.  
23  
24  
25  
26  
27  
28  
29

30 There are however some cost implications, outlined for illustrative purposes (June Minton,  
31 personal communication 2012). A course of 5x 60mg vials (total 300mg) of artesunate at  
32 2012 prices costs £287. A 60kg adult would require 144mg per dose, so would need 1.5  
33 packs in the first 48 hours including loading, costing £381. For IV quinine a pack of 10x  
34 300mg amps (total 3000mg) costs £41. A 60kg adult would require 1200mg loading dose  
35 then 600mg per dose thereafter. Assuming it is given tds, this would require 4200mg in  
36 total for first 48 hours, so about 1.5 packs, costing £61. Each adult treatment course of  
37 artesunate discarded after the expiry date would therefore be around £400 on current  
38 prices.  
39  
40  
41  
42  
43  
44  
45  
46  
47  
48  
49  
50  
51  
52  
53  
54  
55  
56  
57  
58  
59  
60

## Discussion

This study shows that whilst the majority of UK patients with malaria are seen in centres which see many cases of malaria, a significant minority are seen in centres where malaria is rarely seen, and 216 cases (6.1%) were seen in centres which saw fewer than 2 cases a year. Since 5-15% of cases of falciparum malaria probably become severe (although data on this are not reliable)<sup>15</sup> these centres will probably treat a severe case less than once every 5 years. There are 168 acute trusts in the UK and 171 centres reporting malaria over the three years, so it is seen occasionally in the majority of UK hospitals. A hub-and-spoke system for distributing artesunate was unsurprisingly associated with delays in starting treatment- in this study of a relatively limited number of patients of around 7 hours.

The degree of clustering of malaria cases in hospitals has significant operational implications. These include whether rarely used but important drugs, especially parenteral artesunate, are distributed universally or by hub-and-spoke. **It also has important implications for clinical care standards and training since malaria mortality is inversely related to experience at least at a regional level in the UK<sup>5</sup>, a pattern which is almost certainly seen in other non-endemic countries. Identifying training needs and providing support for hospitals with less experience of malaria is important for minimising delays in diagnosis and improving clinical outcomes.**

This hospital-level study is consistent with previous studies on the incidence of malaria in the UK regions<sup>1,5</sup> and likely reflects the UK's demographics and travelling patterns. Outside London, the South East and East of England, the frequency of falciparum malaria was low. Together, the North East, Scotland, Wales and Northern Ireland accounted for less than 4% of all cases. The North East of England and Northern Ireland each notified

1 approximately 3 cases of falciparum malaria per year. The MRL capture rate is 66% so we  
2 estimate these regions may each see 4 to 5 cases of falciparum malaria per year.

3  
4 Assuming 5-15% of falciparum cases become “severe”, we estimate each of these UK  
5  
6 regions could expect to use intravenous artesunate once every 1 to 2 years. In Wales and  
7  
8 Scotland we estimate it might be used 3 to 4 times per year, with most hospitals using no  
9  
10 drug but long geographical distances between hospitals.  
11  
12

13  
14  
15  
16  
17 UK intravenous artesunate supplies have been limited for several years for operational  
18 and regulatory reasons, and it is unlikely this will be resolved soon. Until supplies improve,  
19 the UK and other non-endemic countries will need to distribute and use the drug efficiently  
20 and effectively. Intravenous artesunate has a shelf-life of around 18 months. Our data  
21 suggest that a universal stock system would lead to substantial drug wastage: more than  
22 50% of UK centres with at least one case notified 5 or fewer cases of falciparum malaria  
23 over 3 years and will seldom see severe cases; 2 UK regions notified less than 10 cases  
24 over 3 years. On the other hand, as our data shows, a hub-and-spoke system will lead to  
25 delays in providing artesunate, and since this has been associated with over 20%  
26 reduction in mortality in adults such a delay is likely to be fatal in at least some cases.  
27  
28  
29  
30  
31  
32  
33  
34  
35  
36  
37  
38  
39  
40  
41  
42  
43

#### 44 Limitations:

45  
46 The MRL uses a passive case detection system, which relies on the clinician or laboratory  
47 to report malaria cases. Therefore under-reporting is inevitable: however a capture-  
48 recapture study estimated that 66% of falciparum cases in England are detected by this  
49 system<sup>12</sup> which is high by international standards. **Case-detection rate may vary by  
50 hospital or region as some units may disproportionately under-report cases. For example,  
51 the same study found that London had a higher detection rate than the rest of England.**  
52  
53  
54  
55  
56  
57  
58  
59  
60

1 Hospitals that rarely see malaria may be less familiar with reporting systems; so this study  
2 may underestimate the proportion of the UK's malaria cases seen in these centres.  
3  
4  
5  
6 Scotland has been shown to have a very high case detection rate (over 90%<sup>13</sup>).  
7  
8  
9

10 Of 34 cases excluded due to incomplete data on case location, 26 were from Scotland.

11 These cases represent a significant proportion of the total number of Scottish cases; they  
12 would not have a significant impact on the overall trends described here but make  
13 extrapolating results to Scotland difficult. The Royal Liverpool Hospital and the Hospital for  
14 Tropical Diseases are national centres for Tropical Medicine, regularly receiving patients  
15 and malaria films from throughout the UK. In 98/127 Liverpool cases and 45/266 HTD  
16 cases included in this study, the notifier's location and the patient's usual place-of-  
17 residence were located in different counties or regions, including Greater Manchester,  
18 South West England, Scotland and Wales. It was not clear which of these cases  
19 represented referrals and which represented temporary visitors so all Liverpool  
20 notifications were coded as "Liverpool" and all HTD notifications as "HTD". Some of these  
21 patients may have presented elsewhere initially.  
22  
23  
24  
25  
26  
27  
28  
29  
30  
31  
32  
33  
34  
35  
36  
37  
38  
39

40 HTD operates probably the largest hub-and-spoke distribution system for intravenous  
41 artesunate in the UK. Despite this, the number of cases that could be included was small:  
42 34/50 patients receiving intravenous artesunate during this time period could be included  
43 in this study. The data we have are retrospective. To calculate the diagnosis-to-treatment  
44 time, we used the times as documented in the medical records. Clinicians do not always  
45 document decisions or diagnoses immediately, so the diagnosis-to-treatment times may  
46 appear shorter in this study, which is therefore conservative on delay which may well in  
47 practice be longer than recorded.  
48  
49  
50  
51  
52  
53  
54  
55  
56  
57  
58  
59  
60

## Conclusions

If intravenous artesunate becomes first-line treatment for severe malaria in Europe, UK hospitals will require rapid and reliable access to this emergency drug. While artesunate supplies remain limited, a hub-and-spoke system, based around regional infection centres will minimise drug wastage and ensure the drug is available in the centres which see most cases, but will lead to delays, and almost certainly some avoidable deaths in centres which less regularly see cases and are geographically some way from hubs. A system which restricts artesunate to hospitals that see over 100 cases in 3 years would lead to two-thirds of cases being in other centres. Even having artesunate in the 31 hospitals that see more than 50 cases in 3 years would leave over 25% of malaria cases being treated elsewhere. When parenteral artesunate becomes more freely available, these data suggest the UK should move rapidly towards universal drug distribution, aiming for all acute hospitals to maintain permanent stocks, to ensure early artesunate treatment for all UK severe malaria cases.

## **Acknowledgements.**

The authors would like to acknowledge funding for the Malaria Reference Laboratory from the Health Protection Agency, and additional support from the Special Trustees of the Hospital for Tropical Diseases. Funders had no part in design, analysis or decision to publish. PLC and CJMW are part of the Malaria Centre, LSHTM. PLC is supported by the UCL Hospitals Comprehensive Biomedical Research Centre Infection Theme.



Table 1*Reported cases of falciparum malaria by UK region, 2008-2010*

|                               | 2008   |            | 2009   |            | 2010   |            | All 3 years |            |
|-------------------------------|--------|------------|--------|------------|--------|------------|-------------|------------|
|                               | Number | % of total | Number | % of total | Number | % of total | Number      | % of total |
| <b>North East</b>             | 1      | 0.1        | 4      | 0.3        | 5      | 0.4        | 10          | 0.3        |
| <b>North West</b>             | 49     | 4.5        | 58     | 5          | 85     | 6.7        | 192         | 5.4        |
| <b>Yorkshire &amp; Humber</b> | 19     | 1.8        | 26     | 2.2        | 53     | 4.2        | 98          | 2.8        |
| <b>East Midlands</b>          | 15     | 1.4        | 18     | 1.5        | 34     | 2.7        | 67          | 1.9        |
| <b>West Midlands</b>          | 27     | 2.5        | 45     | 3.8        | 53     | 4.2        | 125         | 3.6        |
| <b>East of England</b>        | 140    | 12.9       | 124    | 10.6       | 138    | 10.9       | 402         | 11.4       |
| <b>South East</b>             | 164    | 15.1       | 161    | 13.7       | 190    | 15.1       | 515         | 14.6       |
| <b>South West</b>             | 30     | 2.8        | 24     | 2.1        | 34     | 2.7        | 88          | 2.5        |
| <b>Greater London</b>         | 614    | 56.6       | 682    | 58.1       | 629    | 49.9       | 1925        | 54.7       |
| <b>Scotland</b>               | 13     | 1.2        | 18     | 1.5        | 22     | 1.7        | 53          | 1.5        |
| <b>Wales</b>                  | 10     | 0.9        | 10     | 0.9        | 16     | 1.3        | 36          | 1          |
| <b>Northern Ireland</b>       | 2      | 0.2        | 4      | 0.3        | 3      | 0.2        | 9           | 0.3        |
| <b>Total</b>                  | 1084   |            | 1174   |            | 1262   |            | 3520        |            |

**Table 2***Number of UK hospitals notifying cases of falciparum malaria, 2008-2010*

| <b>Number of cases notified in 3 years</b> | <b>Number of centres</b> | <b>Total number of cases</b> | <b>% of UK total cases</b> | <b>Cumulative % of UK cases</b> |
|--------------------------------------------|--------------------------|------------------------------|----------------------------|---------------------------------|
| <b>&gt;100</b>                             | 8                        | 1547                         | 43.9                       | 43.9                            |
| <b>51-100</b>                              | 8                        | 552                          | 15.7                       | 59.6                            |
| <b>26-50</b>                               | 15                       | 497                          | 14.1                       | 73.7                            |
| <b>11-25</b>                               | 33                       | 565                          | 16.1                       | 89.8                            |
| <b>6-10</b>                                | 19                       | 143                          | 4.1                        | 93.9                            |
| <b>1-5</b>                                 | 88                       | 216                          | 6.1                        | 100                             |

For peer review only

Table 3

*Falciparum* cases treated with intravenous artesunate from the Hospital for Tropical Diseases

| Age | Gender | County of residence | Country of travel | Parasitaemia on admission | Number of clinical features of severity | Admitting hospital | Site of first artesunate dose | Diagnosis-to-treatment time (hrs) | Initial anti-malarial       |
|-----|--------|---------------------|-------------------|---------------------------|-----------------------------------------|--------------------|-------------------------------|-----------------------------------|-----------------------------|
| 57  | M      | UK                  | Nigeria           | 2.3                       | 1                                       | Elsewhere          | Elsewhere                     | 12                                | iv quinine & doxycycline    |
| 41  | M      | UK                  | Gambia            | 15                        | 6                                       | Elsewhere          | Elsewhere                     | 13                                | iv quinine                  |
| 34  | F      | UK                  | Nigeria           | 37                        | 1                                       | Elsewhere          | HTD                           | 14                                | iv quinine                  |
| 45  | M      | UK                  | Gambia & Liberia  | 27                        | 0                                       | Elsewhere          | HTD                           | 41.5                              | iv quinine                  |
| 51  | M      | UK                  | Nigeria           | 15                        | 3                                       | Elsewhere          | HTD                           | 13                                | iv quinine                  |
| 62  | F      | UK                  | Ghana             | 17                        | 0                                       | Elsewhere          | Elsewhere                     | 5                                 | iv quinine                  |
| 38  | M      | UK                  | Nigeria           | 8                         | 1                                       | Elsewhere          | Elsewhere                     | 26                                | iv quinine & im artemether  |
| 24  | F      | UK                  | Uganda            | 2.7                       | 0                                       | HTD                | HTD                           | 1                                 | iv artesunate               |
| 24  | M      | UK                  | Thailand          | 2.6                       | 0                                       | Elsewhere          | HTD                           | 29                                | iv quinine                  |
| 39  | M      | UK                  | Kenya             | 23                        | 3                                       | Elsewhere          | Elsewhere                     | 4.5                               | iv quinine                  |
| 46  | M      | UK                  | Nigeria           | 8.1                       | 2                                       | Elsewhere          | HTD                           | 34                                | iv quinine                  |
| 41  | M      | UK                  | Uganda            | 2.3                       | 2                                       | Elsewhere          | HTD                           | 9                                 | iv quinine                  |
| 47  | F      | UK                  | Mozambique        | 0.2 (recurrence)          | 0                                       | HTD                | HTD                           | 5                                 | iv artesunate               |
| 46  | M      | UK                  | Sudan             | 20                        | 2                                       | Elsewhere          | Elsewhere                     | 8                                 | iv quinine                  |
| 45  | F      | UK                  | Uganda            | 1.8                       | 1                                       | Elsewhere          | HTD                           | 45                                | iv quinine                  |
| 42  | M      | UK                  | Nigeria           | 1                         | 0                                       | HTD                | HTD                           | 3.5                               | iv artesunate               |
| 36  | M      | UK                  | Nigeria           | 0.3                       | 1                                       | HTD                | HTD                           | 1                                 | iv artesunate               |
| 49  | M      | UK                  | DR Congo          | 15                        | 1                                       | HTD                | HTD                           | 5                                 | iv quinine                  |
| 17  | M      | UK                  | Sierra Leone      | 1.1                       | 0                                       | HTD                | HTD                           | 11                                | iv quinine                  |
| 52  | F      | UK                  | Ghana             | 50                        | 4                                       | Elsewhere          | Elsewhere                     | Unknown                           | iv quinine                  |
| 34  | F      | UK                  | Ghana             | 22                        | 4                                       | Elsewhere          | Elsewhere                     | 4                                 | iv artesunate & clindamycin |

|    |   |    |                     |      |   |           |           |         |                          |
|----|---|----|---------------------|------|---|-----------|-----------|---------|--------------------------|
| 52 | F | UK | Sierra Leone        | 5.2  | 0 | Elsewhere | Elsewhere | Unknown | Unknown                  |
| 27 | F | UK | Tanzania            | 5    | 0 | Elsewhere | HTD       | Unknown | iv quinine               |
| 52 | M | UK | Kenya               | 10   | 1 | Elsewhere | HTD       | 33      | iv quinine               |
| 36 | M | UK | Gabon               | 17.2 | 0 | HTD       | HTD       | 0.5     | iv artesunate            |
| 41 | F | UK | Ghana               | 10   | 1 | Elsewhere | Elsewhere | 7.5     | iv quinine & doxycycline |
| 35 | F | UK | Ghana & Ivory Coast | 9    | 0 | Elsewhere | Elsewhere | Unknown | iv quinine               |
| 70 | M | UK | Nigeria             | 8    | 1 | Elsewhere | Elsewhere | Unknown | iv quinine               |
| 51 | M | UK | Nigeria             | 9.2  | 0 | Elsewhere | Elsewhere | 5       | iv quinine               |
| 39 | M | UK | Uganda              | 30   | 2 | Elsewhere | HTD       | Unknown | iv quinine               |
| 31 | F | UK | Nigeria             | 4.8  | 1 | Elsewhere | HTD       | Unknown | iv quinine               |
| 30 | M | UK | Sierra Leone        | 26.8 | 2 | Elsewhere | HTD       | 21.5    | iv quinine               |
| 47 | F | UK | Sierra Leone        | 12.5 | 2 | Elsewhere | HTD       | 14.5    | iv quinine               |
| 43 | M | UK | Ghana               | 16.4 | 3 | Elsewhere | HTD       | Unknown | iv quinine               |

## References

- 1  
2  
3  
4  
5  
6  
7  
8  
9  
10  
11  
12  
13  
14  
15  
16  
17  
18  
19  
20  
21  
22  
23  
24  
25  
26  
27  
28  
29  
30  
31  
32  
33  
34  
35  
36  
37  
38  
39  
40  
41  
42  
43  
44  
45  
46  
47  
48  
49  
50  
51  
52  
53  
54  
55  
56  
57  
58  
59  
60
- <sup>1</sup>Smith A, Bradley D, Smith V, Blaze M, Behrens R, Chiodini P et al. Imported malaria and high risk groups: observational study using UK surveillance data 1987-2006. *BMJ* 2008; 337:a120
- <sup>2</sup>World Health Organization. Guidelines for the treatment of malaria. *2nd ed.* Geneva: The World Health Organization; 2010
- <sup>3</sup>Newman RD, Parise ME, Barber AM, Steketee RW. Malaria-related deaths among U.S. travelers, 1963-2001. *Ann Intern Med* 2004; 141(7): 547-55
- <sup>4</sup>Christen D, Steffen R, Schlagenhauf P. Deaths caused by malaria in Switzerland 1988-2002. *Am J Trop Med Hyg* 2006; 75(6): 1188-94.
- <sup>5</sup>Checkley A, Smith A, Smith V, Blaze M, Bradley D et al. Risk factors for mortality from imported falciparum malaria in the United Kingdom over 20 years: an observational study. *BMJ* 2012; 344: e2116
- <sup>6</sup>Lalloo DG, Shingadia D, Pasvol G, Chiodini PL, Whitty CJM, Beeching NJ et al. UK malaria treatment guidelines. *J Infect.* 2007; 54(2): 111-21
- <sup>7</sup>Dondorp A, Fanello C, Hendriksen I, Gomes E, Seni A, Chhaganlal K et al. Artesunate versus quinine in the treatment of severe falciparum malaria in African children (AQUAMAT): an open-label, randomised trial. *Lancet* 2010; 376: 1647-57
- <sup>8</sup>Dondorp A, Nosten F, Stepniewska K, Day N, White N at al. Artesunate versus quinine for treatment of severe falciparum malaria: a randomised trial. *Lancet* 2005; 366: 717-25
- <sup>9</sup>Newton PN, Angus BJ, Chierakul W, Dondorp A, Ruangveerayuth R, Silamut K et al. Randomised comparison of artesunate and quinine in the treatment of severe falciparum malaria. *Clin Infect Dis* 2003; 37(1): 7-16.
- <sup>10</sup>World Health Organization. *Prequalification programme: a United Nations programme managed by WHO, 2010.* <http://apps.who.int/prequal/>
- <sup>11</sup>Gomes MF, Faiz MA, Gyapong JO, Warsame M, Agbenyega T, Babiker A et al. Pre-referral rectal artesunate to prevent death and disability in severe malaria: a placebo-controlled trial. *Lancet.* 2009; 373: 557-66.
- <sup>12</sup>Cathcart SJ, Lawrence J, Grant A, Quinn D, Whitty CJ, Jones J et al. Estimating unreported malaria cases in England: a capture-recapture study. *Epidemiol Infect* 2010; 138(7): 1052-8
- <sup>13</sup>Unger HW, McCallum AD, Ukachukwu V, McGoldrick C, Perrow K, Latin G, Norrie G, Morris S, Smith CC, Jones ME. Imported malaria in Scotland--an overview of surveillance, reporting and trends. *Travel Med Infect Dis.* 2011; 9(6): 289-97.
- <sup>14</sup>Office for National Statistics. <http://www.ons.gov.uk/ons/guide-method/geography/beginner-s-guide/administrative/england/government-office-regions/index.html>
- <sup>15</sup>Lubell Y, Staedke SG, Greenwood BM, Kanya MR, Molyneux M, Newton PN et al. Likely health outcomes for untreated acute febrile illness in the tropics in decision and economic models: a Delphi survey. *PLoS One.* 2011; 6: e17439.





Map 2. Geographical distribution of falciparum malaria notifications in England, 2008-2010  
230x238mm (96 x 96 DPI)



1  
2  
3  
4  
5  
6  
7  
8  
9  
10  
11  
12  
13  
14  
15  
16  
17  
18  
19  
20  
21  
22  
23  
24  
25  
26  
27  
28  
29  
30  
31  
32  
33  
34  
35  
36  
37  
38  
39  
40  
41  
42  
43  
44  
45  
46  
47  
48  
49  
50  
51  
52  
53  
54  
55  
56  
57  
58  
59  
60



Map 3. Geographical distribution of falciparum malaria notifications in the North West and West Midlands, 2008-2010  
262x255mm (96 x 96 DPI)





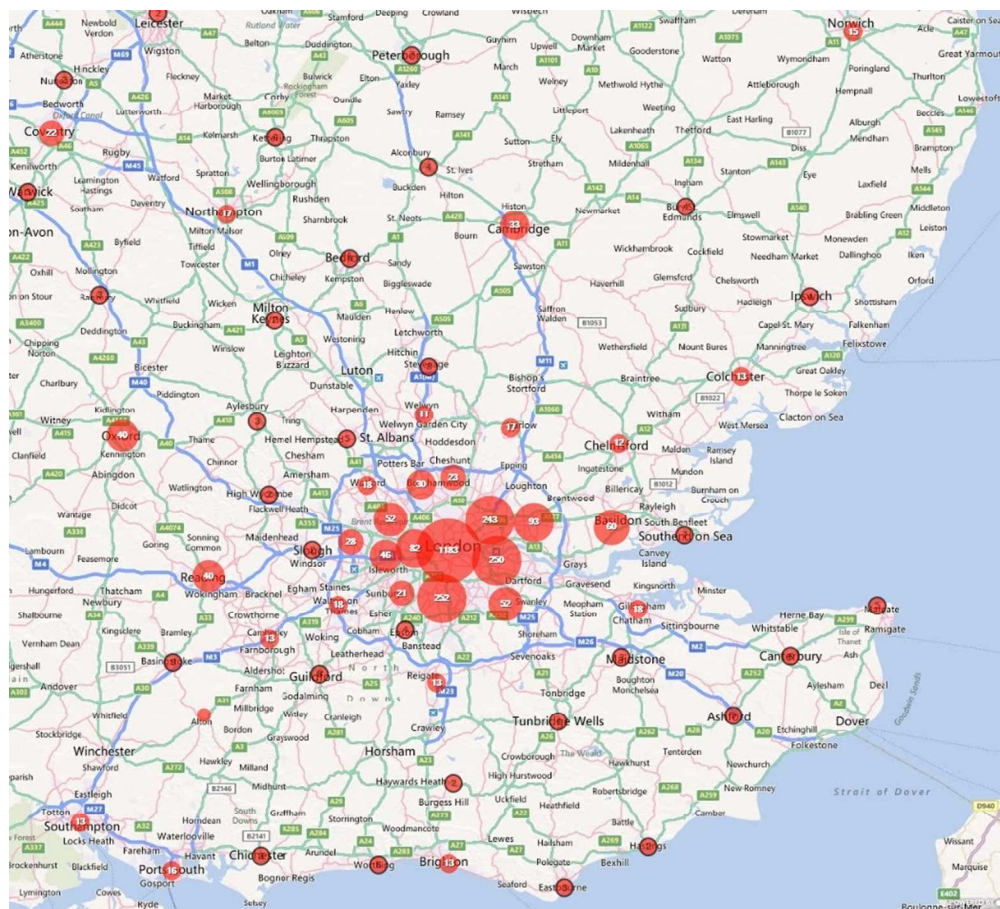

Map 4. Geographical distribution of falciparum malaria notifications in the South East and East of England, 2008-2010  
278x251mm (96 x 96 DPI)

1  
2  
3  
4  
5  
6  
7  
8  
9  
10  
11  
12  
13  
14  
15  
16  
17  
18  
19  
20  
21  
22  
23  
24  
25  
26  
27  
28  
29  
30  
31  
32  
33  
34  
35  
36  
37  
38  
39  
40  
41  
42  
43  
44  
45  
46  
47  
48  
49  
50  
51  
52  
53  
54  
55  
56  
57  
58  
59  
60

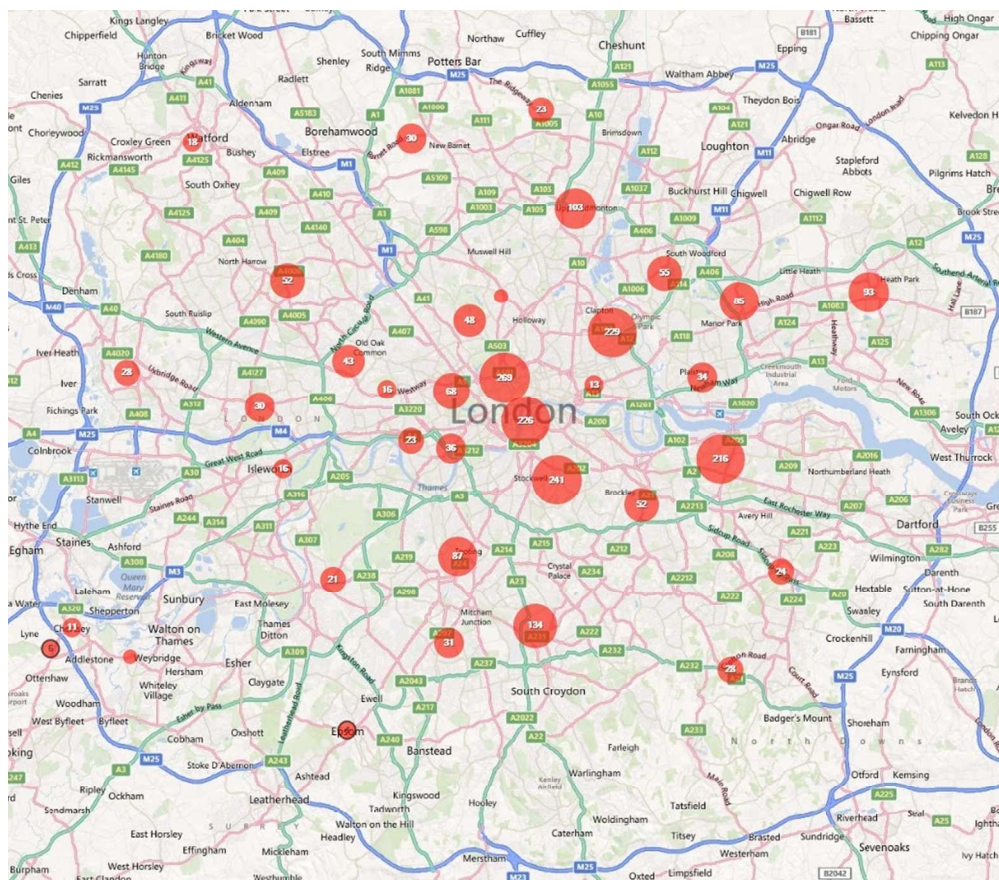

Map 5. Geographical distribution of falciparum malaria notifications in Greater London, 2008-2010  
274x239mm (96 x 96 DPI)

## STROBE Statement—checklist of items that should be included in reports of observational studies

|                              | Item No | Recommendation                                                                                                                                                                                                                                                                                                                                                                                                                                                                                                                                                                                                                                                                                   |
|------------------------------|---------|--------------------------------------------------------------------------------------------------------------------------------------------------------------------------------------------------------------------------------------------------------------------------------------------------------------------------------------------------------------------------------------------------------------------------------------------------------------------------------------------------------------------------------------------------------------------------------------------------------------------------------------------------------------------------------------------------|
| <b>Title and abstract</b>    | 1       | (a) Indicate the study's design with a commonly used term in the title or the abstract<br>(b) Provide in the abstract an informative and balanced summary of what was done and what was found                                                                                                                                                                                                                                                                                                                                                                                                                                                                                                    |
| <b>Introduction</b>          |         |                                                                                                                                                                                                                                                                                                                                                                                                                                                                                                                                                                                                                                                                                                  |
| Background/rationale         | 2       | Explain the scientific background and rationale for the investigation being reported                                                                                                                                                                                                                                                                                                                                                                                                                                                                                                                                                                                                             |
| Objectives                   | 3       | State specific objectives, including any prespecified hypotheses                                                                                                                                                                                                                                                                                                                                                                                                                                                                                                                                                                                                                                 |
| <b>Methods</b>               |         |                                                                                                                                                                                                                                                                                                                                                                                                                                                                                                                                                                                                                                                                                                  |
| Study design                 | 4       | Present key elements of study design early in the paper                                                                                                                                                                                                                                                                                                                                                                                                                                                                                                                                                                                                                                          |
| Setting                      | 5       | Describe the setting, locations, and relevant dates, including periods of recruitment, exposure, follow-up, and data collection                                                                                                                                                                                                                                                                                                                                                                                                                                                                                                                                                                  |
| Participants                 | 6       | (a) <i>Cohort study</i> —Give the eligibility criteria, and the sources and methods of selection of participants. Describe methods of follow-up<br><i>Case-control study</i> —Give the eligibility criteria, and the sources and methods of case ascertainment and control selection. Give the rationale for the choice of cases and controls<br><i>Cross-sectional study</i> —Give the eligibility criteria, and the sources and methods of selection of participants<br>(b) <i>Cohort study</i> —For matched studies, give matching criteria and number of exposed and unexposed<br><i>Case-control study</i> —For matched studies, give matching criteria and the number of controls per case |
| Variables                    | 7       | Clearly define all outcomes, exposures, predictors, potential confounders, and effect modifiers. Give diagnostic criteria, if applicable                                                                                                                                                                                                                                                                                                                                                                                                                                                                                                                                                         |
| Data sources/<br>measurement | 8*      | For each variable of interest, give sources of data and details of methods of assessment (measurement). Describe comparability of assessment methods if there is more than one group                                                                                                                                                                                                                                                                                                                                                                                                                                                                                                             |
| Bias                         | 9       | Describe any efforts to address potential sources of bias                                                                                                                                                                                                                                                                                                                                                                                                                                                                                                                                                                                                                                        |
| Study size                   | 10      | Explain how the study size was arrived at                                                                                                                                                                                                                                                                                                                                                                                                                                                                                                                                                                                                                                                        |
| Quantitative variables       | 11      | Explain how quantitative variables were handled in the analyses. If applicable, describe which groupings were chosen and why                                                                                                                                                                                                                                                                                                                                                                                                                                                                                                                                                                     |
| Statistical methods          | 12      | (a) Describe all statistical methods, including those used to control for confounding<br>(b) Describe any methods used to examine subgroups and interactions<br>(c) Explain how missing data were addressed<br>(d) <i>Cohort study</i> —If applicable, explain how loss to follow-up was addressed<br><i>Case-control study</i> —If applicable, explain how matching of cases and controls was addressed<br><i>Cross-sectional study</i> —If applicable, describe analytical methods taking account of sampling strategy<br>(e) Describe any sensitivity analyses                                                                                                                                |

Continued on next page

**Results**

|                  |     |                                                                                                                                                                                                                                                                                                                                                                                                               |
|------------------|-----|---------------------------------------------------------------------------------------------------------------------------------------------------------------------------------------------------------------------------------------------------------------------------------------------------------------------------------------------------------------------------------------------------------------|
| Participants     | 13* | (a) Report numbers of individuals at each stage of study—eg numbers potentially eligible, examined for eligibility, confirmed eligible, included in the study, completing follow-up, and analysed<br>(b) Give reasons for non-participation at each stage<br>(c) Consider use of a flow diagram                                                                                                               |
| Descriptive data | 14* | (a) Give characteristics of study participants (eg demographic, clinical, social) and information on exposures and potential confounders<br>(b) Indicate number of participants with missing data for each variable of interest<br>(c) <i>Cohort study</i> —Summarise follow-up time (eg, average and total amount)                                                                                           |
| Outcome data     | 15* | <i>Cohort study</i> —Report numbers of outcome events or summary measures over time<br><i>Case-control study</i> —Report numbers in each exposure category, or summary measures of exposure<br><i>Cross-sectional study</i> —Report numbers of outcome events or summary measures                                                                                                                             |
| Main results     | 16  | (a) Give unadjusted estimates and, if applicable, confounder-adjusted estimates and their precision (eg, 95% confidence interval). Make clear which confounders were adjusted for and why they were included<br>(b) Report category boundaries when continuous variables were categorized<br>(c) If relevant, consider translating estimates of relative risk into absolute risk for a meaningful time period |
| Other analyses   | 17  | Report other analyses done—eg analyses of subgroups and interactions, and sensitivity analyses                                                                                                                                                                                                                                                                                                                |

**Discussion**

|                  |    |                                                                                                                                                                            |
|------------------|----|----------------------------------------------------------------------------------------------------------------------------------------------------------------------------|
| Key results      | 18 | Summarise key results with reference to study objectives                                                                                                                   |
| Limitations      | 19 | Discuss limitations of the study, taking into account sources of potential bias or imprecision. Discuss both direction and magnitude of any potential bias                 |
| Interpretation   | 20 | Give a cautious overall interpretation of results considering objectives, limitations, multiplicity of analyses, results from similar studies, and other relevant evidence |
| Generalisability | 21 | Discuss the generalisability (external validity) of the study results                                                                                                      |

**Other information**

|         |    |                                                                                                                                                               |
|---------|----|---------------------------------------------------------------------------------------------------------------------------------------------------------------|
| Funding | 22 | Give the source of funding and the role of the funders for the present study and, if applicable, for the original study on which the present article is based |
|---------|----|---------------------------------------------------------------------------------------------------------------------------------------------------------------|

\*Give information separately for cases and controls in case-control studies and, if applicable, for exposed and unexposed groups in cohort and cross-sectional studies.

**Note:** An Explanation and Elaboration article discusses each checklist item and gives methodological background and published examples of transparent reporting. The STROBE checklist is best used in conjunction with this article (freely available on the Web sites of PLoS Medicine at <http://www.plosmedicine.org/>, Annals of Internal Medicine at <http://www.annals.org/>, and Epidemiology at <http://www.epidem.com/>). Information on the STROBE Initiative is available at [www.strobe-statement.org](http://www.strobe-statement.org).
